# A solution to the learning dilemma for recurrent networks of spiking neurons

Guillaume Bellec<sup>1,°</sup>, Franz Scherr<sup>1,°</sup>, Anand Subramoney<sup>1</sup>, Elias Hajek<sup>1</sup>, Darjan Salaj<sup>1</sup>,  
Robert Legenstein<sup>1</sup>, Wolfgang Maass<sup>1,\*</sup>

<sup>1</sup>Institute of Theoretical Computer Science, Graz University of Technology,  
Inffeldgasse 16b, Graz, Austria

<sup>°</sup> First authors.

\* To whom correspondence should be addressed; E-mail: maass@igi.tugraz.at.

**Recurrently connected networks of spiking neurons underlie the astounding information processing capabilities of the brain. But in spite of extensive research, it has remained open how learning through synaptic plasticity could be organized in such networks. We argue that two pieces of this puzzle were provided by experimental data from neuroscience. A new mathematical insight tells us how they need to be combined to enable network learning through gradient descent. The resulting learning method – called *e-prop* – approaches the performance of *BPTT* (backpropagation through time), the best known method for training recurrent neural networks in machine learning. But in contrast to *BPTT*, *e-prop* is biologically plausible. In addition, it elucidates how brain-inspired new computer chips – that are drastically more energy efficient – can be enabled to learn.**

## 16 **Introduction**

17 Networks of neurons in the brain differ in at least two essential aspects from deep networks  
18 in machine learning: They are recurrently connected by synapses, forming a giant number of  
19 loops, and they communicate via asynchronously emitted stereotypical electrical pulses, called  
20 spikes, rather than bits or numbers that are produced in a synchronized manner by each layer.  
21 Models that capture primary information processing capabilities of spiking neurons in the brain  
22 are well known, and we consider the arguably most prominent one: leaky integrate-and-fire  
23 (LIF) neurons, where spikes that arrive from other neurons through synaptic connections are  
24 multiplied with the corresponding synaptic weight, and are linearly integrated by a leaky mem-  
25 brane potential. The neuron fires – i.e., emits a spike – when the membrane potential reaches a  
26 firing threshold.

27 An important open problem is how recurrent networks of spiking neurons (RSNNs) can  
28 learn, i.e., how their synaptic weights can be modified by local rules for synaptic plasticity so  
29 that the computational performance of the network improves. In deep learning this problem is  
30 solved for feedforward networks through gradient descent for a loss function  $E$  that measures  
31 imperfections of current network performance (*LeCun et al., 2015*). Gradients of  $E$  are prop-  
32 agated backwards through all layers of the feedforward networks to each synapse through a  
33 process called backpropagation. Recurrently connected networks can compute more efficiently  
34 because each neuron can participate several times in a network computation, and they are able  
35 to solve tasks that require integration of information over time and a suitable timing of network  
36 outputs according to task demands. But since a synaptic weight can affect the network compu-  
37 tation at several time points during a computation, its impact on the loss function (see Fig. 1A)  
38 is more indirect, and learning through gradient descent becomes substantially more difficult in  
39 a recurrent network. In machine learning one had solved this problem 30 years ago by unrolling

40 a recurrent network into a virtual feedforward network, see Fig. 1B, and applying the backprop-  
41 agation algorithm to it (Fig. 1C). This learning method for recurrent neural networks is called  
42 backpropagation through time (*BPTT*).

43 We show that with a careful choice of the pseudo-derivative for handling the discontinuous  
44 dynamics of spiking neurons one can apply this learning method also to RSNNs, yielding the  
45 by far best performing learning algorithm for such networks (see (*Huh and Sejnowski, 2018*)  
46 for related preceding results). But the dilemma is that *BPTT* requires storing the intermediate  
47 states of all neurons during a network computation, and to merge these in a subsequent offline  
48 process with gradients that are computed backwards in time (see Fig. 1C and Movie S2). This  
49 makes it very unlikely that *BPTT* is used by the brain (*Lillicrap and Santoro, 2019*). This  
50 dilemma is exacerbated by the fact that neurons in the brain have a repertoire of additional  
51 internal dynamic processes on slower time scales that are not reflected in the LIF model, but  
52 which are likely to contribute to the superior capabilities of RSNNs in the brain to compute in  
53 the temporal domain. In fact, even in machine learning one uses special types of neuron models,  
54 called LSTM (Long Short-Term Memory) units, in order to handle such tasks. But any neuron  
55 model that has additional internal processes, and hence more hidden variables that capture their  
56 current state, makes learning in a recurrent network of such neurons even more difficult.

57 We present an approach for solving this dilemma: *e-prop* (Fig. 1D and 1E, see Movie S3).  
58 It can be applied not only to RSNNs, but also to recurrent networks of LSTM units and most  
59 other types of recurrent neural networks. We focus on the application of *e-prop* to RSNNs  
60 that have, besides LIF neurons, also a more sophisticated form of LIF neurons, called ALIF  
61 neurons. An ALIF neuron has a second hidden variable besides its membrane potential: an  
62 adaptive firing threshold. The firing threshold of an ALIF neuron increases through each of its  
63 spikes and decays back to a resting value between spikes. This models firing rate adaptation, a  
64 well known feature of a fraction of neurons in the brain (*Allen Institute: Cell Types Database*,

65 2018) that dampens their firing activity. We refer to an RSNN that contains a fraction of ALIF  
66 neurons as a Long short-term memory Spiking Neural Network (LSNN), because we show  
67 that ALIF neurons provide a qualitative jump in temporal computing capabilities of RSNNs,  
68 allowing RSNNs to approach for the first time the performance of LSTM networks in machine  
69 learning for temporal processing tasks.

70 *E-prop* is motivated by two streams of experimental data from neuroscience that can be seen  
71 as providing hints how the brain solves the learning dilemma for RSNNs:

72 i) The dynamics of neurons in the brain is enriched by continuously ongoing updates of  
73 traces of past activity on the molecular level, for example in the form of calcium ions  
74 or activated CaMKII enzymes (*Sanhueza and Lisman, 2013*). These traces in particular  
75 record events where the presynaptic neuron fired before the postsynaptic neuron, which  
76 is known to induce Hebbian-like STDP (spike timing dependent plasticity) if followed by  
77 a top-down learning signal (*Cassenaer and Laurent, 2012, Yagishita et al., 2014, Gerstner*  
78 *et al., 2018*). We refer to local traces of this type as eligibility traces in our learning  
79 model.

80 ii) In the brain there exists an abundance of top-down signals such as dopamine and acetyl-  
81 choline, to name only a few, that inform local populations of neurons about sub-optimal  
82 performance of brain computations. Interestingly some of these signals are of a predictive  
83 nature, e.g. they predict upcoming rewards in the case of dopamine or movement errors in  
84 the case of the error-related negativity (ERN), see (*MacLean et al., 2015*). Furthermore  
85 both dopamine signals (*Engelhard et al., 2019, Roeper, 2013*) and ERN-related neural  
86 firing (*Sajad et al., 2019*) are reported to be specific for a target population of neurons,  
87 rather than global. We refer to such top-down signals as learning signals in our learning  
88 model.

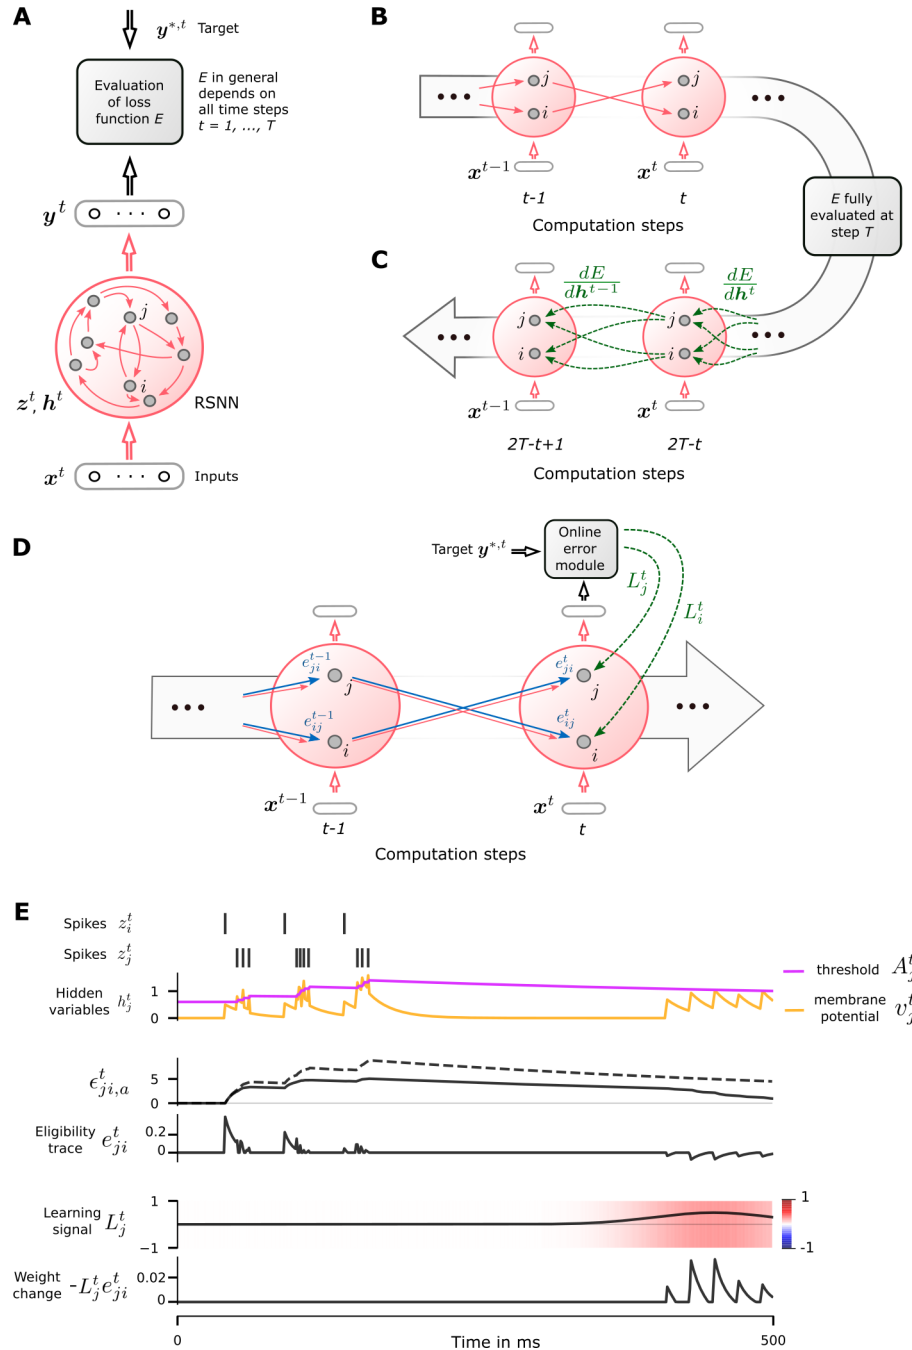

Figure 1: (Caption on the next page.)

Figure 1: **Schemes for RSNNs, BPTT, and e-prop.** **A)** RSNN with network inputs  $x$ , neuron spikes  $z$ , and output targets  $y^*$ , for each time step  $t$  of the RSNN computation. Output neurons  $y$  provide a low-pass filter of network spike  $z$ . **B)** BPTT computes gradient in the unrolled version of the network. It has a copy of all neurons of the RSNN for each time step  $t$ . A synaptic connection from neuron  $i$  to neuron  $j$  of the RSNN is replaced by an array of feedforward connections, one for each time step  $t$ , that goes from the copy of neuron  $i$  in the layer for time step  $t$  to a copy of neuron  $j$  in the layer for time step  $t + 1$ . All synapses in this array have the same weight: the weight of this synaptic connection in the RSNN. **C)** Loss gradients of *BPTT* are propagated backwards in time and retrograde across synapses in an offline manner, long after the forward computation has passed a layer. **D)** Online learning dynamics of *e-prop*. Feedforward computation of eligibility traces is indicated in blue. These are combined with online learning signals according to equ. (1). **E)** Illustration of the dynamics of ALIF neurons and *e-prop*. Observable variables (spikes)  $z^t$  and hidden variables of an ALIF neuron, slow factor  $\epsilon_{ji,a}^t$  (equation (22)) of the eligibility trace  $e_{ji}^t$  (equation (23)) of the synapse from neuron  $i$  to neuron  $j$ , as well as a learning signal  $L_j^t$  and the resulting online weight change proposed by *e-prop*. In this case a late activation of a learning signal, such as dopamine in the experiments of (Yagishita *et al.*, 2014), it transforms the eligibility trace into the modification of the synaptic weight. The dashed curve above the plot of  $\epsilon_{ji,a}^t$  shows an easily computable approximation (see equation (24)) of  $\epsilon_{ji,a}^t$  as low-pass filter of STDP-inducing spiking events that can be used for an approximation of *e-prop*.

89 Our re-analysis of the mathematical basis of gradient descent in recurrent neural networks  
90 in equ. (1) tells us how eligibility traces and learning signals need to be combined to produce  
91 network learning through gradient descent – without backpropagation of signals through time or  
92 retrograde through synaptic connections. We will show that the resulting new learning method,  
93 *e-prop*, approximates the performance of *BPTT* for RSNNs, thereby providing a solution to the  
94 learning dilemma for RSNNs. We demonstrate this on tasks for supervised learning (Fig. 2,3)  
95 and reinforcement learning (Fig. 4). None of these tasks were previously known to be solvable  
96 by RSNNs.

97 The previously described learning dilemma for RSNNs also affects the development of  
98 new, brain inspired computing hardware, which aims at a drastic reduction in the energy con-  
99 sumption of computing and learning. Resulting new designs of computer chips, such as Intels  
100 Loihi (Davies *et al.*, 2018), are usually focused on RSNN architectures. On-chip learning capa-

101 bility for these RSNNs in the hardware is essential. Although it does not matter here whether  
102 the learning algorithm is biologically plausible, the excessive storage and offline processing de-  
103 mands of BPTT make this option unappealing for such novel computing hardware also. Hence  
104 a corresponding learning dilemma exists also there. *E-prop* does not contain any features that  
105 make it unlikely to be implementable on such neuromorphic chips, thereby promising a solution  
106 also for this learning dilemma.

## 107 **Results**

### 108 **Mathematical basis for *e-prop***

109 Spikes are modeled as binary variables  $z_j^t$  that assume value 1 if neuron  $j$  fires at time  $t$ , oth-  
110 erwise value 0. It is common to let  $t$  vary over small discrete time steps, e.g. of 1ms length.  
111 The goal of network learning is to find synaptic weights  $W$  that minimize a given loss function  
112  $E$ .  $E$  may depend on all or a subset of the spikes in the network.  $E$  measures in the case of  
113 regression or classification learning the deviation of the actual output  $y_k^t$  of each output neuron  
114  $k$  at time  $t$  from its given target value  $y_k^{*,t}$  (Fig. 1A). In reinforcement learning (RL), the goal  
115 is to optimize the behavior of an agent in order to maximize obtained rewards. In this case,  $E$   
116 measures deficiencies of the current agent policy to collect rewards.

117 The gradient  $\frac{dE}{dW_{ji}}$  for the weight  $W_{ji}$  of the synapse from neuron  $i$  to neuron  $j$  tells us how  
118 this weight should be changed in order to reduce  $E$ . The key observation for *e-prop* (see proof  
119 in Methods) is that this gradient can be represented as a sum over the time steps  $t$  of the RSNN  
120 computation: A sum of products of learning signals  $L_j^t$  (specific for the post-synaptic neuron  $j$   
121 of the corresponding synapse) and synapse-specific eligibility traces  $e_{ji}^t$ :

$$\frac{dE}{dW_{ji}} = \sum_t L_j^t e_{ji}^t. \quad (1)$$

122 The ideal value of  $L_j^t$  is the derivative  $\frac{dE}{dz_j^t}$ , which tells us how the current spike output  $z_j^t$  of  
123 neuron  $j$  affects  $E$ . In contrast, the eligibility trace  $e_{ji}^t$  does not depend on  $E$ , but on the internal  
124 dynamics of neuron  $j$ . It tells us how a change of the weight  $W_{ji}$  would affect its spike output  $z_j^t$   
125 via the temporal evolution of the hidden variables of neuron  $j$ , without considering recurrent  
126 loops formed with other neurons (see equation (S2) in supplementary materials).

127 We view (1) as a program for online learning: In order to reduce  $E$ , change at each step  $t$   
128 of the network computation all synaptic weights  $W_{ji}$  proportionally to  $-L_j^t e_{ji}^t$  (see Fig. 1E for  
129 an illustration). There is no need to explicitly compute or store the sum (1), or to wait for later  
130 signals. Hence *e-prop* is an online learning method in a strict sense (see Fig. 1D and Movie S3).  
131 In particular, there is no need to unroll the network as for *BPTT*. Furthermore, in contrast to  
132 the previously known real time recurrent learning algorithm (RTRL, see (*Williams and Zipser,*  
133 *1989*) and Methods), which substantially increases the required number of multiplications as  
134 function of network size, *e-prop* is – up to a constant factor – not more costly than the RSNN  
135 computation itself. This is obviously an important issue both for biological plausibility and  
136 neuromorphic implementations.

137 Since the ideal value  $\frac{dE}{dz_j^t}$  of the learning signal  $L_j^t$  also captures influences which the current  
138 spike output  $z_j^t$  of neuron  $j$  may have on  $E$  via future spikes of other neurons, its precise value  
139 is in general not available at time  $t$ . We replace it by an approximation that ignores these  
140 indirect influences: Only currently arising errors at the output neurons  $k$  of the RSNN are taken  
141 into account, and are routed with neuron-specific weights  $B_{jk}$  to the network neurons  $j$ , (see  
142 Fig. 2A):

$$L_j^t = \sum_k B_{jk} \underbrace{(y_k^t - y_k^{*,t})}_{\text{error of output } k \text{ at time } t}. \quad (2)$$

143 Although this signal  $L_j^t$  only captures errors that arise at the current time step  $t$ , it is combined  
144 in equation (1) with an eligibility trace  $e_{ji}^t$  that may reach far back into the past of the target



145 neuron  $j$  (see Fig. 1E). In this way *e-prop* alleviates the need to propagate signals backwards in  
146 time.

147 There are several strategies for choosing the weights  $B_{jk}$  for this online learning signal. In  
148 *symmetric e-prop* we set it equal to the corresponding output weight  $W_{kj}^{\text{out}}$  from neuron  $j$  to out-  
149 put neuron  $k$ . This learning signal is closest to the theory, and would be theoretically optimal  
150 in the absence of recurrent connections. Biologically more plausible are two variants that avoid  
151 weight sharing: If all network neurons  $j$  are connected to output neurons  $k$ , we let  $B_{jk}$  evolve in  
152 *adaptive e-prop* through a simple local plasticity rule that mirrors the plasticity rule applied to  
153  $W_{kj}^{\text{out}}$ . In *random e-prop* the values of the weights  $B_{jk}$  are randomly chosen and remain fixed,  
154 similar to broadcast alignment for feedforward networks (Lillicrap et al., 2016, Nøklund, 2016).  
155 Resulting synaptic plasticity rules (see Methods) look very similar to previously proposed plas-  
156 ticity rules (Gerstner et al., 2018). In particular they involve postsynaptic depolarization as one  
157 of the factors, similarly as the data-based rule in (Clopath et al., 2010), see section S6 in the  
158 supplement for an analysis.

159 We finally would like to mention that the Learning-to-Learn approach can be used to train a  
160 separate neural network to generate – instead of the previously considered options – tailor-made  
161 learning signals for a limited range of potential learning tasks. This variation of *e-prop* enables  
162 for example one-shot learning of new arm movements (Bellec et al., 2019).

## 163 **Comparing the performance of *e-prop* and *BPTT* on a common benchmark** 164 **task**

165 The speech recognition task TIMIT (Garofolo et al., 1993) is one of the most commonly used  
166 benchmarks for temporal processing capabilities of different types of recurrent neural networks  
167 and different learning approaches (Greff et al., 2017). It comes in two versions. Both use, as  
168 input, acoustic speech signals from sentences that are spoken by 630 speakers from 8 dialect

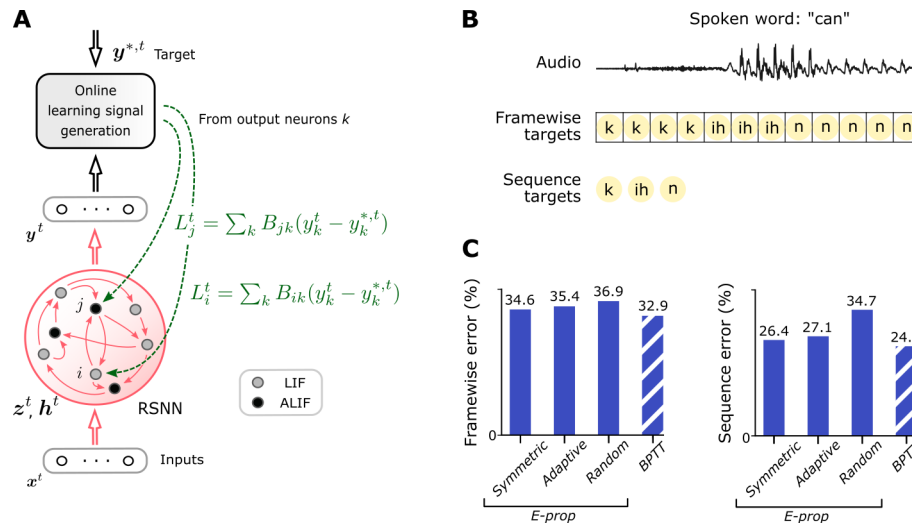

Figure 2: **Comparison of the performance of BPTT and *e-prop* on TIMIT.** **A)** Network architecture for *e-prop*, illustrated for an LSNN consisting of LIF and ALIF neurons. **B)** Input and target output for the two versions of TIMIT. **C)** Performance of BPTT and the three versions of *e-prop* for LSNNs consisting of 800 neurons for framewise targets and 2400 for sequence targets.

169 regions of the USA (see the top of Fig. 2B for a sample segment). In the simpler version, used  
 170 for example in (Greff *et al.*, 2017), the goal is to recognize which of 61 phonemes is spoken  
 171 in each 10 ms time frame (“frame-wise classification”). In the harder version from (Graves  
 172 *et al.*, 2013), which achieved an essential step toward human-level performance in speech-  
 173 to-text transcription, the goal is to recognize the sequence of phonemes in the entire spoken  
 174 sentence independently of their timing (“sequence transcription”). *E-prop* approximates the  
 175 performance of BPTT on LSNNs for both versions of TIMIT very well, as shown in Fig. 2C.  
 176 For the more difficult version of TIMIT we trained as in (Graves *et al.*, 2013) a complex LSNN  
 177 consisting of a feedforward sequence of three recurrent networks. Our results show that *e-prop*  
 178 can also handle learning for such more complex network structures very well. In Fig. S2 we  
 179 show for comparison also the performance of LSTM networks. These data show that for both  
 180 versions of TIMIT the performance of LSNNs comes rather close to that of LSTM networks.

181 This has previously not been demonstrated for any type of RSNN with any learning method  
182 on a real-world benchmark task for temporal processing. The FORCE method of (*Nicola and*  
183 *Clopath, 2017*) is the best performing previously known learning method for RSNNs. However  
184 this learning method was not argued to be biologically realistic, since the plasticity rule for each  
185 synaptic weight required knowledge of the current values of all other synaptic weights in the  
186 RSNNs. It was applied in (*Nicola and Clopath, 2017*) to supervised learning of several pattern  
187 generation task. We show in Figs. S1 and S5 that RSNNs can learn such tasks also with *e-prop*,  
188 hence without the biologically unrealistic feature of FORCE. We show in Fig S2 that *e-prop* can  
189 not only be applied to RSNNs, but also to LSTM networks – and many other types of recurrent  
190 networks – that fit under the quite general model discussed in Methods. Furthermore, *e-prop*  
191 approximates the performance of BPTT very well for LSTM networks as well (Fig. S2).

## 192 ***E-prop* performance for a task where temporal credit assignment is difficult**

193 A hallmark of cognitive computations in the brain is the capability to go beyond a purely re-  
194 active mode, to integrate diverse sensory cues over time, and to wait until the right moment  
195 arrives for an action. A large number of experiments in neuroscience analyze neural coding  
196 after learning for such tasks. But it had remained unknown how one can model the underlying  
197 learning processes in RSNNs of the brain. We wondered whether *e-prop* can fill this void. As  
198 an example we consider the task that was studied in the experiments of (*Morcos and Harvey,*  
199 *2016, Engelhard et al., 2019*). There a rodent learnt to run along a linear track in a virtual  
200 environment, where it encountered several visual cues on the left and right, see Fig. 3A and  
201 Movie S2. Later, when it arrived at a T-junction, it had to decide whether to turn left or right.  
202 It was rewarded when it turned to that side from which it had previously received the majority  
203 of visual cues. This task is not easy to learn since the subject needs to find out that it does  
204 not matter on which side the last cue was, or in which order the cues were presented. Instead,

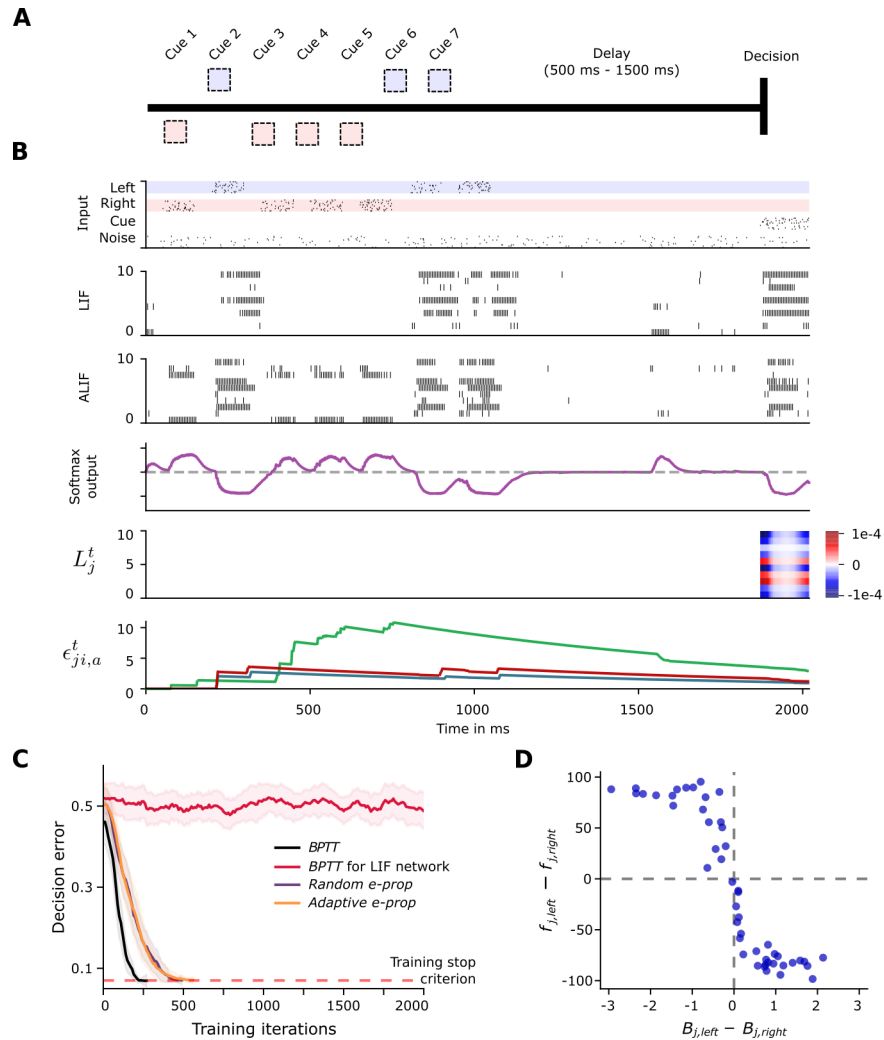

**Figure 3: Solving a task with difficult temporal credit assignment by *e-prop*.** **A)** Setup of corresponding rodent experiments of (Morcos and Harvey, 2016, Engelhard et al., 2019), see Movie S2. **B)** Input spikes, internal spiking activity of 10 out of 50 sample LIF neurons and 10 out of 50 sample ALIF neurons, softmax output, sample learning signals and samples of slow components of eligibility traces in the bottom row. **C)** Learning curves for *BPTT* and two *e-prop* versions. **D)** Correlation between the broadcast weights  $B_{jk}$  for  $k = \text{left/right}$  for learning signals in *random e-prop* and sensitivity to “left” and “right” input components after learning.  $f_{j,\text{left}}$  ( $f_{j,\text{right}}$ ) is the resulting average firing rate of neuron  $j$  during presentation of left (right) cues after learning.

205 the subject has to learn to count cues separately for each side and to compare the two resulting  
206 numbers. Furthermore the cues need to be processed long before a reward is given. We show in  
207 Fig. S4 that LSNNs can learn this task through *reward-based e-prop*. But since the LSNNs can  
208 alleviate there the temporal credit assignment problem through reward prediction, we wondered  
209 whether an LSNN would also be able to learn via *e-prop* a supervised learning variation of this  
210 task, where a teacher tells the subject at the end of each trial what would have been the right  
211 decision. This yields a really challenging scenario for *e-prop* since non-zero learning signals  $L_j^t$   
212 arise only during the last 150ms of a trial (Fig. 3B). Hence all synaptic plasticity of *e-prop* has  
213 to take place during these last 150ms, long after the relevant computations on input cues had  
214 been carried out. The result of training an LSNN with *BPTT* and *e-prop* for solving this task is  
215 shown in Fig. 3C (illustrated in Movies S3 and S4). Whereas this task can not even be solved  
216 by *BPTT* with a regular RSNN that has no adapting neurons (red curve), all 3 previously dis-  
217 cussed variations of *e-prop* can solve it if the RSNN contains adapting neurons. We also explain  
218 in section S2.4 how this task can be solved for sparsely connected LSNNs when biologically  
219 inspired stochastic rewiring (Kappel *et al.*, 2018) is integrated into *e-prop*.

220 But how can the neurons in the LSNN learn to record and count the input cues if all the  
221 learning signals are identically 0 until the last 150ms (5th row of Fig. 3B)? The solution is indi-  
222 cated in the bottom row of Fig. 3B: The slow component  $\epsilon_{j,i,a}^t$  (equation (22)) of the eligibility  
223 traces  $e_{ji}$  of adapting neurons  $j$  decays with the long time constant of firing rate adaptation  
224 (see equation (27) and Movie S4), that typically lies in the range of seconds. Since these traces  
225 stretch from the beginning of the trial into its last phase, they enable assignment of credit to  
226 firing events that happened over 1000 ms ago. Fig. 3D provides insight into the functional role  
227 of the broadcast weights of *random e-prop* in this context: The difference of these weights de-  
228 termines for each neuron  $j$  whether it learns to respond in the first phase of a trial more to cues  
229 from the left or right. This observation suggests that neuron-specific learning signals for RSNNs

230 have the advantage that they can create a variety of feature detectors for task-relevant network  
231 inputs. Hence a suitable weighted sum of these feature detectors is able to cancel remaining  
232 errors at the network output, similarly as in the case of feedforward networks (*Lillicrap et al.,*  
233 *2016*).

### 234 ***Reward-based e-prop***

235 Deep RL has recently produced really powerful results in machine learning and AI through  
236 clever applications of *BPTT* to RL (*Mnih et al., 2016*). We found that one of the arguably most  
237 powerful RL methods within the range of deep RL approaches that are not directly biologically  
238 implausible, policy gradient in combination with actor-critic, can be implemented with *e-prop*.  
239 This yields the biologically plausible RL algorithm *reward-based e-prop*. The LSNN learns  
240 through *reward-based e-prop* both an approximation to the value function and a stochastic pol-  
241 icy. Neuron-specific learning signals are combined in *reward-based e-prop* with a global signal  
242 that transmits reward prediction errors (Fig. S3). In contrast to the supervised case where the  
243 learning signals depend on the deviation from an external target signal, the learning signals here  
244 are emitted when an action is taken and they express here how much this action deviates from  
245 the action mean that is currently proposed by the network. We show in Methods that *reward-*  
246 *based e-prop* yields local reward-based rules for synaptic plasticity that are in many aspects  
247 similar to ones that have previously been discussed in the literature (*Gerstner et al., 2018*). But  
248 those previously proposed rules estimated gradients of the policy essentially by correlating the  
249 noisy output of network neurons with rewards, which is known to be inefficient due to noisy  
250 gradient estimates. In contrast, *reward-based e-prop* computes policy- and value-gradients by  
251 approximating *BPTT*, which is one of the pillars of modern deep RL.

252 We tested *reward-based e-prop* on a task that captures the essence of numerous learning  
253 experiments in systems neuroscience: A delayed goal-directed movement has to be learnt, con-

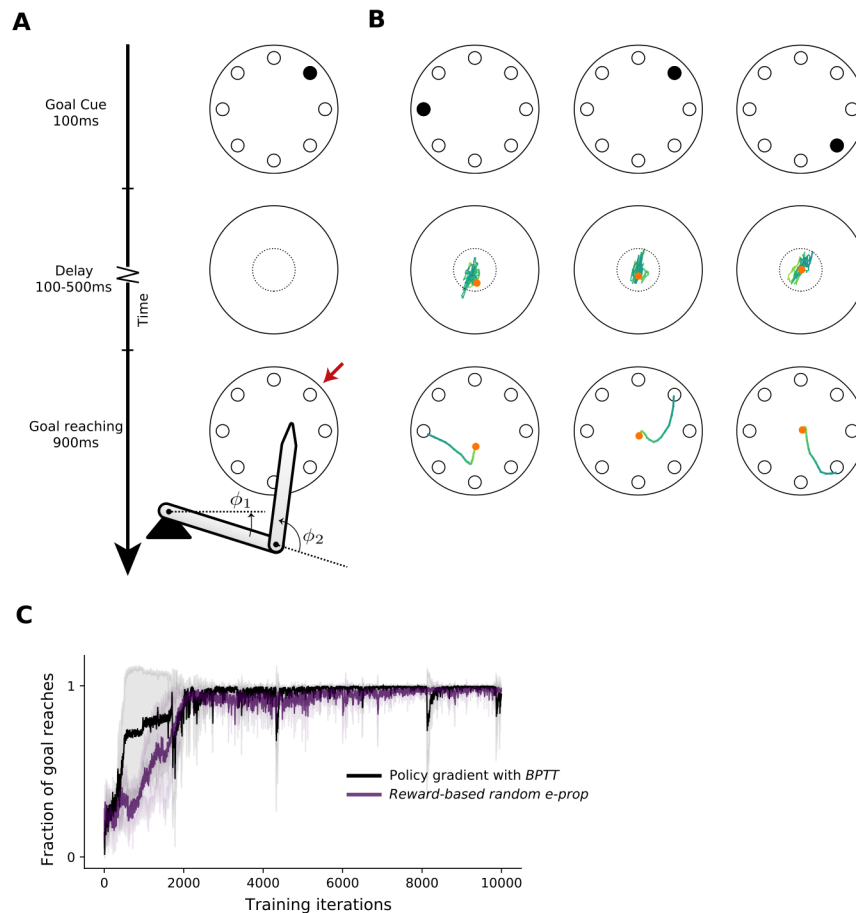

Figure 4: **Application of *e-prop* to RL.** **A)** Scheme of the delayed arm movement task. The red arrow points to the formerly visible goal. The arm always starts moving from the center of the circle. **B)** Resulting arm movement in three sample trials after learning. The orange dot indicates the position of the tip of the arm at the end of the delay period. **C)** Performance of *reward-based random e-prop* and of a control where *e-prop* is replaced by *BPTT*, both for an LSNN consisting of 350 LIF and 150 ALIF neurons. Solid curves show the mean over 5 different runs, and shaded area indicates 1 standard deviation.

254 sisting of a sequence of many 2-dimensional continuous motor commands, each of them being  
255 only loosely linked to rewards. We chose a setup where the agent first receives a spatial goal  
256 cue (Fig. 4A), then has to control the angles of a two-joint arm during a delay so that its tip  
257 remains – in spite of motor noise that result from the stochastic policy – within a center region  
258 (indicated by a dotted circle) in order to avoid small negative rewards, until it receives a go-cue  
259 (see Movie S5). The agent then has to move the tip of the arm to the location of the initial goal  
260 cue in order to receive a reward. Note that no forward- or inverse model of the arm was given  
261 to the LSNN, it had to learn those implicitly. This task had so far been beyond the reach of  
262 biologically plausible learning, for any type of neural network model.

263 Three sample trials after learning are shown in Fig. 4B (and in Movie S6). Fig. 4C shows that  
264 *reward-based e-prop* is able to solve this demanding RL task about as well as policy gradient  
265 with biologically implausible *BPTT*. We conjecture that variants of *reward-based e-prop* will  
266 be able to solve most RL tasks that can be solved by online actor-critic methods in machine  
267 learning.

## 268 Discussion

269 We propose that in order to understand the computational function and neural coding of higher  
270 brain areas, one needs to understand the organization of the plasticity mechanisms that install  
271 and maintain the computational functions of the underlying RSNNs. So far *BPTT* was the only  
272 candidate for that, since no other learning method provided sufficiently powerful computational  
273 function to RSNN models. But since *BPTT* is not viewed to be biologically realistic (*Lillicrap*  
274 *and Santoro, 2019*), it does not help us to understand the organization of synaptic plasticity  
275 in RSNNs of the brain. *E-prop* offers a solution to this dilemma, since it does not require  
276 biologically unrealistic mechanisms, but still enables RSNNs to learn difficult computational  
277 tasks almost as well as *BPTT*. In particular, we have shown in Fig. 3 and 4 that *e-prop* enables



278 us to model for the first time the learning processes in RSNNs of the brain that underlie the  
279 emergence of complex behaviors in key experiments of systems neuroscience.

280 *E-prop* relies on two types of signals that are abundantly available in the brain, but whose  
281 precise role for learning have not yet been understood: eligibility traces and learning signals.  
282 Since *e-prop* is based on a transparent mathematical principle, it provides a normative model  
283 for both types of signals, as well as for synaptic plasticity rules. In particular, it suggests a new  
284 rule for the organization of eligibility traces: that the time constant of the eligibility trace for a  
285 synapse is correlated with the time constant for the history-dependence of the firing activity of  
286 the postsynaptic neuron. It also suggests that the experimentally found diverse time constants  
287 of the firing activity of populations of neurons in different brain areas (*Runyan et al., 2017*)  
288 are correlated with their capability to handle corresponding ranges of delays in temporal credit  
289 assignment for learning. Finally, *e-prop* theory suggests that learning signals for different pop-  
290 ulations of neurons should be diverse, rather than uniform and global (see section S6.2), and  
291 should be correlated with the impact which the activity of these neurons has on the quality of  
292 the learnt behavior.

293 Apart from these consequences of *e-prop* for research in neuroscience and cognitive science,  
294 *e-prop* also provides an interesting new tool for approaches in machine learning where *BPTT*  
295 is replaced by approximations in order to improve computational efficiency. For example, the  
296 combination of eligibility traces from *e-prop* with synthetic gradients from (*Jaderberg et al.,*  
297 *2016*) substantially improves performance of LSTM networks for difficult machine learning  
298 problems such as the copy-repeat task and the Penn Treebank word prediction task (*Bellec*  
299 *et al., 2019*).

300 Finally, *E-prop* suggests a viable new approach for on-chip learning of RSNNs on neuro-  
301 morphic chips. Whereas *BPTT* is not within the reach of current neuromorphic chip designs,  
302 an implementation of *e-prop* appears to offer no serious hurdle. Since we have shown in Fig. 2

303 that *e-prop* enables RSNNs to learn to understand speech, and in Fig. 4 that *e-prop* enables  
304 reward-based learning of the control of complex arm movements, *e-prop* promises to support a  
305 qualitative jump in on-chip learning capabilities of neuromorphic chips.

## 306 **Methods**

307 To exhibit the theory around *e-prop* and preceding related work, we structure the methods sec-  
308 tion in the following way:

- 309 • Comparison of *e-prop* with other online learning methods for recurrent neural networks  
310 (RNNs)
- 311 • Network models
- 312 • Conventions
- 313 • Mathematical basis for *e-prop*
- 314 • Eligibility traces
- 315 • Eligibility traces for concrete neuron models
- 316 • Derivation of the synaptic plasticity rules resulting from *e-prop*
- 317 • *Reward-based e-prop*: application of *e-prop* to policy gradient RL.

### 318 **Comparison of *e-prop* with other online learning methods for recurrent** 319 **neural networks (RNNs)**

320 In this section we compare *e-prop* with other learning algorithms implementing gradient de-  
321 scent in RNNs without BPTT. A well-known alternative to *BPTT* is real time recurrent learning

322 (RTRL). RTRL was derived for networks of rate-based (sigmoidal) neurons in (*Williams and*  
 323 *Zipser, 1989*). There, the loss gradients are computed forward in time by multiplying the full  
 324 Jacobian  $\mathbf{J}_{kk'}^t = \frac{d\mathbf{h}_k^t}{d\mathbf{h}_{k'}^{t-1}}$  of the network dynamics with the tensor  $\frac{d\mathbf{h}_k^t}{dW_{ji}}$  that computes the depen-  
 325 dency of the state variables with respect to the parameters:  $\frac{d\mathbf{h}_k^t}{dW_{ji}} = \sum_{k'} \mathbf{J}_{kk'}^t \cdot \frac{d\mathbf{h}_{k'}^{t-1}}{dW_{ji}} + \frac{\partial \mathbf{h}_k^t}{\partial W_{ji}}$   
 326 (see equation (12) in (*Williams and Zipser, 1989*)). Denoting with  $n$  the number of neurons,  
 327 this requires  $O(n^4)$  multiplications, which is computationally prohibitive. Unbiased Online Re-  
 328 current Optimization (*Tallec and Ollivier, 2018*) (UORO) used an unbiased estimator of  $\mathbf{J}_{kk'}^t$  of  
 329 rank one that can be computed online. The authors report that the variance of this estimator  
 330 increases with the network size and simulations were only carried out for a network size up to  
 331 64. Another unbiased estimator of  $\mathbf{J}_{kk'}^t$  (*Mujika et al., 2018*) based on Kronecker factors solved  
 332 this issue and made it possible to approach the performance of *BPTT* on harder tasks. Yet this  
 333 method requires  $O(n^3)$  operations per time step, which is one order more than UORO, *e-prop*  
 334 or *BPTT*.

335 In *e-prop*, the eligibility traces are just  $d \times d$  matrices ( $d$  being the dimension of  $\mathbf{h}_j^t$ ), since  
 336 they are restrictions of the full Jacobian  $\mathbf{J}_{kk'}^t$  to the internal dynamics of a neuron ( $k = k'$ ). As a  
 337 consequence, only  $O(n^2)$  multiplications are required for the forward propagation of eligibility  
 338 traces. Hence their computation is not more costly than *BPTT* or the simulation of the RNN.

339 The learning rule called Superspike (*Zenke and Ganguli, 2018*) was derived by applying  
 340 RTRL in spiking neural networks without recurrent connections. In the absence of these con-  
 341 nections RTRL is practicable and the resulting learning rule uses eligibility traces similar to  
 342 those arising in *e-prop* with LIF neurons. Two other algorithms, (*Roth et al., 2019*) and (*Murray,*  
 343 *2019*), were introduced to train recurrent neural networks of sigmoidal units by approximating  
 344 RTRL with another form of eligibility traces. Random Feedback Local Online (RFLO) learn-  
 345 ing (*Murray, 2019*) is equivalent to *random e-prop* in the particular case of leaky sigmoidal  
 346 neurons for regression tasks. But the performance of RFLO was not compared to *BPTT* on

347 published benchmarks for RNNs, or for spiking neurons. In contrast to the eligibility traces in  
348 *e-prop*, the eligibility traces in kernel RNN learning (keRNL) (Roth et al., 2019) are viewed as  
349 components of an estimator of the tensor  $\mathbf{J}_{kk'}^t$ , and are not related to the specific definition of  
350 the neuron model. This approach requires non-local communication within the RNN, which we  
351 wanted to avoid in *e-prop*. In contrast to *e-prop*, none of the papers above (Zenke and Ganguli,  
352 2018, Murray, 2019, Roth et al., 2019) derived a theory or a definition of eligibility traces that  
353 can be applied to neuron models with a non-trivial internal dynamics, such as adaptive neurons  
354 or LSTM units, that appear to be essential for solving tasks with demanding temporal credit  
355 assignment of errors.

## 356 **Network models**

357 To exhibit the generality of the *e-prop* approach, we define the dynamics of recurrent neural  
358 networks using a general formalism that is applicable to many recurrent neural network models,  
359 not only to RSNNs and LSNNs. Also non-spiking models such as LSTM networks fit under  
360 this formalism (see Section S4.3 in the Supplement). The network dynamics is summarized by  
361 the computational graph in Fig. 5. It uses the function  $M$  to define the update of the hidden  
362 state:  $\mathbf{h}_j^t = M(\mathbf{h}_j^{t-1}, \mathbf{z}^{t-1}, \mathbf{x}^t, \mathbf{W})$ , and  $f$  to define the update of the observable state:  $z_j^t =$   
363  $f(\mathbf{h}_j^t, \mathbf{z}^{t-1}, \mathbf{x}^t, \mathbf{W})$  ( $f$  simplifies to  $z_j^t = f(\mathbf{h}_j^t)$  for LIF and ALIF neurons).

364 **RSNNs.** RSNNs are recurrently connected networks of leaky integrate-and-fire (LIF) neu-  
365 rons. Each LIF neuron has a one dimensional internal state  $h_j^t$  that consists only of the mem-  
366 brane potential  $v_j^t$ . The observable state  $z_j^t \in \{0, 1\}$  is binary, indicating a spike ( $z_j^t = 1$ ) or no

367 spike ( $z_j^t = 0$ ) at time  $t$ . The dynamics of the LIF model is defined by the equations:

$$v_j^{t+1} = \alpha v_j^t + \sum_{i \neq j} W_{ji}^{\text{rec}} z_i^t + \sum_i W_{ji}^{\text{in}} x_i^{t+1} - z_j^t v_{\text{th}} \quad (3)$$

$$z_j^t = H\left(v_j^t - v_{\text{th}}\right), \quad (4)$$

368 where  $x_i^t = 1$  indicates a spike from the input neuron  $i$  at time step  $t$  ( $x_i^t = 0$  otherwise) and  
 369  $W_{ji}^{\text{rec}}$  ( $W_{ji}^{\text{in}}$ ) is the synaptic weight from network (input) neuron  $i$  to neuron  $j$ . The decay factor  
 370  $\alpha$  in (3) is given by  $e^{-\delta t/\tau_m}$ , where  $\delta t$  is the discrete time step size (1 ms in our simulations) and  
 371  $\tau_m = 20$  ms is the membrane time constant.  $H$  denotes the Heaviside step function.

372 Due to the term  $-z_j^t v_{\text{th}}$  in equation (3), the neurons membrane potential is reduced by  
 373 a constant value after an output spike, which relates our model to the spike response model  
 374 (*Gerstner et al., 2014*). To introduce a simple model of neuronal refractoriness, we further  
 375 assume that  $z_j^t$  is fixed to 0 after each spike of neuron  $j$  for a short refractory period of 2 to 5ms  
 376 depending on the simulation.

377 **LSNNs.** LSNNs are recurrently connected networks that consist of LIF neurons and of adap-  
 378 tive LIF (ALIF) neurons. An ALIF neuron has a time-dependent threshold adaptation  $a_j^t$ . As  
 379 a result, their internal state is a 2 dimensional vector  $\mathbf{h}_j^t \stackrel{\text{def}}{=} [v_j^t, a_j^t]$ . Their threshold potential  
 380  $A_j^t$  increases with every output spike and decreases exponentially back to the baseline threshold  
 381  $v_{\text{th}}$ . This can be described by

$$A_j^t = v_{\text{th}} + \beta a_j^t, \quad (5)$$

$$z_j^t = H(v_j^t - A_j^t), \quad (6)$$

382 with a threshold adaptation according to

$$a_j^{t+1} = \rho a_j^t + z_j^t, \quad (7)$$

383 where the decay factor  $\rho$  is given by  $e^{-\delta t/\tau_a}$ , and  $\tau_a$  is the adaptation time constant that is  
 384 typically chosen to be in the range of the time span of the length of the working memory that  
 385 is a relevant for a given task. This is a very simple model for a neuron with spike frequency  
 386 adaptation. We refer to (Gerstner et al., 2014, Pozzorini et al., 2015, Gouwens et al., 2018) for  
 387 experimental data and other neuron models.

388 In relation to the more general formalism represented in the computational graph in Fig. 5,  
 389 equations (3) and (7) define  $M(\mathbf{h}_j^{t-1}, \mathbf{z}^{t-1}, \mathbf{x}^t, \mathbf{W})$ , and equations (4) and (6) define  $f(\mathbf{h}_j^t)$ .

390 **Gradient descent for RSNNs.** Gradient descent is problematic for spiking neurons because  
 391 of the step function  $H$  in equation (4). We overcome this issue as in (Esser et al., 2016, Bellec  
 392 et al., 2018): the non-existing derivative  $\frac{\partial z_j^t}{\partial v_j^t}$  is replaced in simulations by a simple nonlinear  
 393 function of the membrane potential that is called the pseudo-derivative. Outside of the refractory  
 394 period, we choose a pseudo-derivative of the form  $\psi_j^t = \frac{1}{v_{th}} \gamma_{pd} \max\left(0, 1 - \left|\frac{v_j^t - A_j^t}{v_{th}}\right|\right)$  where  
 395  $\gamma_{pd} = 0.3$ . During the refractory period the pseudo derivative is set to 0.

396 **Network output and loss functions.** We assume that network outputs  $y_k^t$  are real-valued and  
 397 produced by leaky output neurons (readouts), which are not recurrently connected:

$$y_k^t = \kappa y_k^{t-1} + \sum_j W_{kj}^{out} z_j^t + b_k^{out}, \quad (8)$$

398 where  $\kappa \in [0, 1]$  defines the leak and  $b_k^{out}$  denotes the output bias. The leak factor  $\kappa$  is given  
 399 for spiking neurons by  $e^{-\delta t/\tau_{out}}$ , where  $\tau_{out}$  is the membrane time constant. Note that for non-  
 400 spiking neural networks (such as for LSTM networks), temporal smoothing of the network  
 401 observable state is not necessary. In this case, one can use  $\kappa = 0$ .

402 The loss function  $E$  quantifies the network performance. We assume that it depends only  
 403 on the observable states  $E(\mathbf{z}^1, \dots, \mathbf{z}^T)$ . For instance, for a regression problem we define  $E$  as

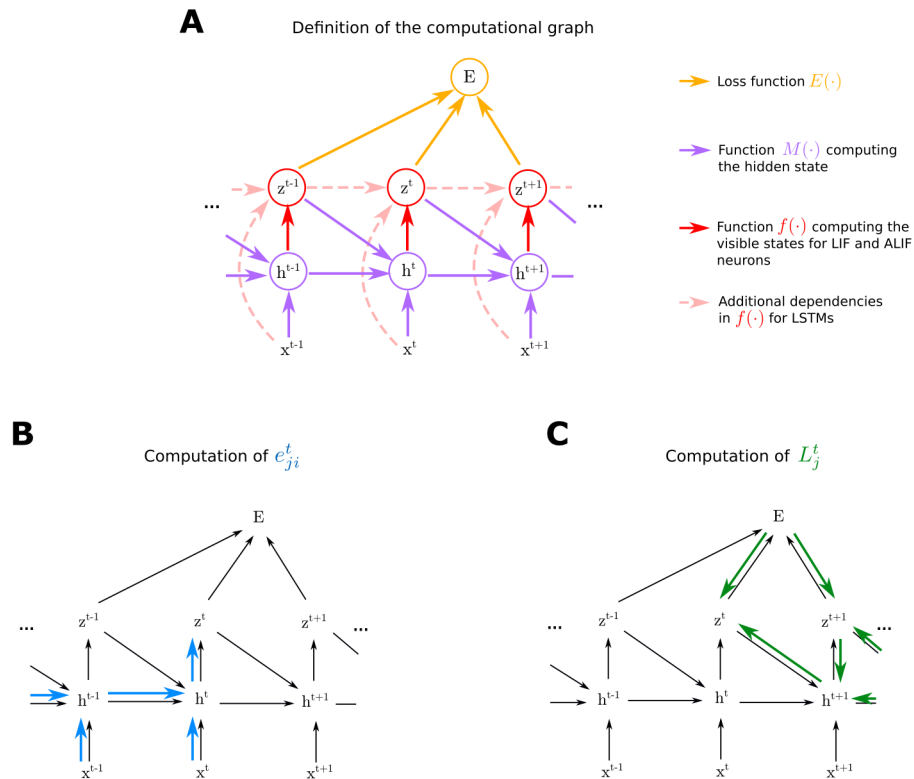

**Figure 5: Computational graph and gradient propagations** **A**) Assumed mathematical dependencies between hidden neuron states  $h_j^t$ , neuron outputs  $z^t$ , network inputs  $x^t$ , and the loss function  $E$  through the mathematical functions  $E(\cdot)$ ,  $M(\cdot)$ ,  $f(\cdot)$  are represented by coloured arrows. **B-C**) The gradient computation can be represented in similar graphs, where coloured arrows represent partial derivatives. **B**) Following equation (19), the derivatives involved in the computation of eligibility traces  $e_{ji}^t$  are shown in blue in the case where  $i$  is an input neuron. **C**) Unlike the eligibility traces, the ideal learning signals required to back-propagate gradients as represented here with green arrows.

404 the mean square error  $E = \frac{1}{2} \sum_{t,k} (y_k^t - y_k^{*,t})^2$  between the network outputs  $y_k^t$  and target values  
 405  $y_k^{*,t}$ . For classification or RL tasks the loss function  $E$  has to be re-defined accordingly.

## 406 Conventions

407 **Notation for derivatives.** We distinguish the total derivative  $\frac{dE}{dz^i}(\mathbf{z}^1, \dots, \mathbf{z}^T)$ , which takes  
 408 into account how  $E$  depends on  $\mathbf{z}_t$  also indirectly through influence of  $\mathbf{z}^t$  on the other vari-  
 409 ables  $\mathbf{z}^{t+1}, \dots, \mathbf{z}^T$ , and the partial derivative  $\frac{\partial E}{\partial \mathbf{z}^t}(\mathbf{z}^1, \dots, \mathbf{z}^T)$  which quantifies only the direct  
 410 dependence of  $E$  on  $\mathbf{z}^t$ .

411 Analogously  $\frac{\partial M}{\partial \mathbf{h}}$  denotes for  $\mathbf{h}_j^t = M(\mathbf{h}_j^{t-1}, \mathbf{z}^{t-1}, \mathbf{x}^t, \mathbf{W})$ , the partial derivative of  $M$  with  
 412 respect to  $\mathbf{h}$ . It only quantifies the direct influence of  $\mathbf{h}_j^t$  on  $\mathbf{h}_j^{t-1}$  and it does not take into account  
 413 the dependency of  $\mathbf{h}_j^t$  on  $\mathbf{h}_j^{t-1}$  via the observable states  $\mathbf{z}^t$ . To improve readability we also use  
 414 the following abbreviations:  $\frac{\partial \mathbf{h}_j^t}{\partial \mathbf{h}_j^{t-1}} \stackrel{\text{def}}{=} \frac{\partial M}{\partial \mathbf{h}}(\mathbf{h}_j^{t-1}, \mathbf{z}^{t-1}, \mathbf{x}^t, \mathbf{W})$ ,  $\frac{\partial \mathbf{h}_j^t}{\partial W_{ji}} \stackrel{\text{def}}{=} \frac{\partial M}{\partial W_{ji}}(\mathbf{h}_j^{t-1}, \mathbf{z}^{t-1}, \mathbf{x}^t, \mathbf{W})$ ,  
 415 and  $\frac{\partial z_j^t}{\partial \mathbf{h}_j^t} \stackrel{\text{def}}{=} \frac{\partial f}{\partial \mathbf{h}}(\mathbf{h}_j^t, \mathbf{z}^{t-1}, \mathbf{x}^t, \mathbf{W})$ .

416 **Notation for temporal filters.** For ease of notation we use the operator  $\mathcal{F}_\alpha$  to denote the  
 417 low-pass filter such that, for any time series  $x_t$ :

$$\mathcal{F}_\alpha(x^t) = \alpha \mathcal{F}_\alpha(x^{t-1}) + x^t, \quad (9)$$

418 and  $\mathcal{F}_\alpha(x^0) = x^0$ . In the specific case of the time series  $z_j^t$  and  $e_{ji}^t$ , we simplify notation further  
 419 and write  $\bar{z}_j^t$  and  $\bar{e}_{ji}^t$  for  $\mathcal{F}_\alpha(z_j^t)$  and  $\mathcal{F}_\kappa(e_{ji}^t)$

## 420 Mathematical basis for *e-prop*

421 We provide here the proof of the fundamental equation (1) for *e-prop*

$$\frac{dE}{dW_{ji}} = \sum_t \frac{dE}{dz_j^t} e_{ji}^t. \quad (10)$$



422 This equation shows that the total derivative of the loss function  $E$  with respect to the synaptic  
 423 weights  $\mathbf{W}$  can be written as a product of learning signals  $L_j^t$  and eligibility traces  $e_{ji}^t$  for the  
 424 “ideal” learning signal  $L_j^t = \frac{dE}{dz_j}$ . The eligibility traces are defined at the end of the proof below.

425 We start from a factorization of the loss gradient that arises in equation (12) of (Werbos,  
 426 1990) to describe *BPTT* in recurrent sigmoidal neural networks. Using our notation, this clas-  
 427 sical factorization of loss gradient can be rewritten as:

$$\frac{dE}{dW_{ji}} = \sum_{t'} \frac{dE}{d\mathbf{h}_j^{t'}} \cdot \frac{\partial \mathbf{h}_j^{t'}}{\partial W_{ji}}. \quad (11)$$

428 We now show how one can derive from this to the new factorization (10) of the loss gradient  
 429 that underlies *e-prop*.  $\frac{dE}{d\mathbf{h}_j^{t'}}$  can be expressed recursively as a function of the same derivative at  
 430 the next time step  $\frac{dE}{d\mathbf{h}_j^{t'+1}}$  by applying the chain rule at the node  $\mathbf{h}_j^t$  for  $t = t'$  of the computational  
 431 graph shown in Figure 5C:

$$\frac{dE}{d\mathbf{h}_j^{t'}} = \frac{dE}{dz_j^{t'}} \frac{\partial z_j^{t'}}{\partial \mathbf{h}_j^{t'}} + \frac{dE}{d\mathbf{h}_j^{t'+1}} \frac{\partial \mathbf{h}_j^{t'+1}}{\partial \mathbf{h}_j^{t'}} \quad (12)$$

$$= L_j^{t'} \frac{\partial z_j^{t'}}{\partial \mathbf{h}_j^{t'}} + \frac{dE}{d\mathbf{h}_j^{t'+1}} \frac{\partial \mathbf{h}_j^{t'+1}}{\partial \mathbf{h}_j^{t'}}, \quad (13)$$

432 where we defined the learning signal  $L_j^{t'}$  as  $\frac{dE}{dz_j^{t'}}$ . The resulting recursive expansion ends at the  
 433 last time step  $T$  of the computation of the RNN, i.e.,  $\frac{dE}{d\mathbf{h}_j^{T+1}} = 0$ . If one substitutes the recursive  
 434 formula (13) into the definition of the loss gradients (11), one gets:

$$\frac{dE}{dW_{ji}} = \sum_{t'} \left( L_j^{t'} \frac{\partial z_j^{t'}}{\partial \mathbf{h}_j^{t'}} + \frac{dE}{d\mathbf{h}_j^{t'+1}} \frac{\partial \mathbf{h}_j^{t'+1}}{\partial \mathbf{h}_j^{t'}} \right) \cdot \frac{\partial \mathbf{h}_j^{t'}}{\partial W_{ji}} \quad (14)$$

$$= \sum_{t'} \left( L_j^{t'} \frac{\partial z_j^{t'}}{\partial \mathbf{h}_j^{t'}} + (L_j^{t'+1} \frac{\partial z_j^{t'+1}}{\partial \mathbf{h}_j^{t'+1}} + (\dots) \frac{\partial \mathbf{h}_j^{t'+2}}{\partial \mathbf{h}_j^{t'+1}} \frac{\partial \mathbf{h}_j^{t'+1}}{\partial \mathbf{h}_j^{t'}}) \right) \cdot \frac{\partial \mathbf{h}_j^{t'}}{\partial W_{ji}}. \quad (15)$$

435 The following equation is the main equation for understanding the transformation from *BPTT*  
 436 into *e-prop*. The key idea is to collect all terms which are multiplied with the learning signal  
 437  $L_j^t$  at a given time  $t$ . These are only terms that concern events in the computation of neuron  $j$

438 up to time  $t$ , and they do not depend on other future losses or variable values. We collect them  
 439 into an eligibility trace  $e_{ji}^t$  for each neuron  $j$  and  $i$ , which can be computed locally in an online  
 440 manner.

441 To this end, we write the term in parentheses in equation (15) into a second sum indexed by  
 442  $t$  and exchange the summation indices to pull out the learning signal  $L_j^t$ . This expresses the loss  
 443 gradient of  $E$  as a sum of learning signals  $L_j^t$  multiplied by some factor indexed by  $ji$ , which  
 444 we define as the eligibility trace  $e_{ji}^t \in \mathbb{R}$  and eligibility vectors  $\epsilon_{ji}^t \in \mathbb{R}^d$ , which have the same  
 445 dimension as the hidden states  $\mathbf{h}_{ji}^t$

$$\frac{dE}{dW_{ji}} = \sum_{t'} \sum_{t \geq t'} L_j^t \frac{\partial z_j^t}{\partial \mathbf{h}_j^t} \frac{\partial \mathbf{h}_j^t}{\partial \mathbf{h}_j^{t-1}} \cdots \frac{\partial \mathbf{h}_j^{t'+1}}{\partial \mathbf{h}_j^{t'}} \cdot \frac{\partial \mathbf{h}_j^{t'}}{\partial W_{ji}} \quad (16)$$

$$= \sum_t L_j^t \frac{\partial z_j^t}{\partial \mathbf{h}_j^t} \underbrace{\sum_{t' \leq t} \frac{\partial \mathbf{h}_j^t}{\partial \mathbf{h}_j^{t-1}} \cdots \frac{\partial \mathbf{h}_j^{t'+1}}{\partial \mathbf{h}_j^{t'}} \cdot \frac{\partial \mathbf{h}_j^{t'}}{\partial W_{ji}}}_{\stackrel{\text{def}}{=} \epsilon_{ji}^t} \quad (17)$$

446 Here, we use the identity matrix for  $\frac{\partial \mathbf{h}_j^t}{\partial \mathbf{h}_j^{t-1}} \cdots \frac{\partial \mathbf{h}_j^{t'+1}}{\partial \mathbf{h}_j^{t'}}$  if  $t = t'$ . After defining the eligibility vector  
 447  $\epsilon_{ji}^t$ , we also define

$$e_{ji}^t \stackrel{\text{def}}{=} \frac{\partial z_j^t}{\partial \mathbf{h}_j^t} \cdot \epsilon_{ji}^t, \quad (18)$$

448 so that equation (17) proves the factorization of *e-prop* in (1).

## 449 Eligibility traces

450 **Online computation of eligibility traces.** The eligibility vectors as defined in (17) can be  
 451 computed recursively for efficiency and in order to avoid the back-propagation of signals through  
 452 time:

$$\epsilon_{ji}^t = \frac{\partial \mathbf{h}_j^t}{\partial \mathbf{h}_j^{t-1}} \cdot \epsilon_{ji}^{t-1} + \frac{\partial \mathbf{h}_j^t}{\partial W_{ji}}, \quad (19)$$

453 where  $\cdot$  denotes the dot product. The eligibility traces can be computed with their definition in  
 454 equation (18).

## 455 Derivation of eligibility traces for concrete neuron models

456 The eligibility traces for LSTMs are provided in the supplementary materials. Below we provide  
457 the derivation of eligibility traces for spiking neurons.

458 **Eligibility traces for LIF neurons.** We compute the eligibility trace of a LIF neuron without  
459 adaptive threshold (equation (3)). Here the hidden state  $\mathbf{h}_j^t$  consists just of the membrane poten-  
460 tial  $v_j^t$  and we have  $\frac{\partial \mathbf{h}_j^{t+1}}{\partial \mathbf{h}_j^t} = \frac{\partial v_j^{t+1}}{\partial v_j^t} = \alpha$  and  $\frac{\partial v_j^t}{\partial W_{ji}} = z_i^{t-1}$  (for a derivation of the eligibility traces  
461 taking the reset into account we refer to section S1.2). Using these derivatives and equation  
462 (19), one obtains that the eligibility vector is the low-pass filtered pre-synaptic spike-train,

$$\epsilon_{ji}^{t+1} = \mathcal{F}_\alpha(z_i^t) \stackrel{\text{def}}{=} \bar{z}_i^t. \quad (20)$$

463 and following equation (18), the eligibility trace is:

$$e_{ji}^{t+1} = \psi_j^{t+1} \bar{z}_i^t. \quad (21)$$

464 For LIF neurons as well as for ALIF neurons in the following section the derivation applies to  
465 the input connections by substituting the network spikes  $z_i^{t-1}$  by the input spikes  $x_i^t$  (the time  
466 index switches from  $t - 1$  to  $t$  because the hidden state  $\mathbf{h}_j^t = M(\mathbf{h}_j^{t-1}, \mathbf{z}^{t-1}, \mathbf{x}^t, \mathbf{W})$  is defined  
467 as a function of the input at time  $t$  but the preceding recurrent activity). For simplicity we have  
468 focused on the case where transmission delays between neurons in the RSNN are just 1ms. If  
469 one uses more realistic length of delays  $d$ , this  $-d$  appears in equations (21)–(23) instead of  $-1$   
470 as the most relevant time point for pre-synaptic firing (see Section S1.3). This moves resulting  
471 synaptic plasticity rules closer to experimentally observed forms of STDP.

472 **Eligibility traces for ALIF neurons.** The hidden state of an ALIF neuron  $\mathbf{h}_j^t = [v_j^t, a_j^t]$  is a  
473 two dimensional vector to capture the state of the adaptive threshold  $a_j^t$  besides the membrane  
474 potential  $v_j^t$ . Hence a two dimensional eligibility vector  $\epsilon_{ji}^t \stackrel{\text{def}}{=} [\epsilon_{ji,v}^t, \epsilon_{ji,a}^t]$  is associated with

475 each weight, and the matrix  $\frac{\partial h_j^{t+1}}{\partial h_j^t}$  is a  $2 \times 2$  matrix. The derivatives  $\frac{\partial a_j^{t+1}}{\partial a_j^t}$  and  $\frac{\partial a_j^{t+1}}{\partial v_j^t}$  capture  
 476 the dynamics of the adaptive threshold. Hence to derive the computation of eligibility traces  
 477 we substitute the spike  $z_j$  in equation (7) by its definition given in equation (6). With this  
 478 convention one finds that the diagonal of the matrix  $\frac{\partial h_j^{t+1}}{\partial h_j^t}$  is formed by the terms  $\frac{\partial v_j^{t+1}}{\partial v_j^t} = \alpha$  and  
 479  $\frac{\partial a_j^{t+1}}{\partial a_j^t} = \rho - \psi_j^t \beta$ . Above and below the diagonal, one finds respectively  $\frac{\partial v_j^{t+1}}{\partial a_j^t} = 0$ ,  $\frac{\partial a_j^{t+1}}{\partial v_j^t} =$   
 480  $\psi_j^t$ . One can finally compute the eligibility traces using equation (18). The component of the  
 481 eligibility vector associated with the membrane potential remains the same as in the LIF case  
 482 and only depends on the presynaptic neuron:  $\epsilon_{ji,v}^t = \bar{z}_i^{t-1}$ . For the component associated with  
 483 the adaptive threshold we find the following recursive update:

$$\epsilon_{ji,a}^{t+1} = \psi_j^t \bar{z}_i^{t-1} + (\rho - \psi_j^t \beta) \epsilon_{ji,a}^t, \quad (22)$$

484 and this results in an eligibility trace of the form:

$$e_{ji}^t = \psi_j^t \left( \bar{z}_i^{t-1} - \beta \epsilon_{ji,a}^t \right). \quad (23)$$

485 Recall that the constant  $\rho = \exp(-\frac{\delta t}{\tau_a})$  arises from the adaptation time constant  $\tau_a$ , which  
 486 typically lies in the range of hundreds of milliseconds to a few seconds in our experiments,  
 487 yielding values of  $\rho$  between 0.995 and 0.9995. The constant  $\beta$  is typically of the order of 0.07  
 488 in our experiments.

489 To provide a more interpretable form of eligibility trace that fits into the standard form of  
 490 local terms considered in 3-factor learning rules (*Gerstner et al., 2018*), one may drop the term  
 491  $-\psi_j^t \beta$  in equation (22). This approximation  $\hat{\epsilon}_{ji,a}^t$  of equation (22) becomes an exponential trace  
 492 of the post-pre pairings accumulated within a time window as large as the adaptation adaptation  
 493 time constant:

$$\hat{\epsilon}_{ji,a}^{t+1} = \mathcal{F}_\rho \left( \psi_j^t \bar{z}_i^{t-1} \right). \quad (24)$$

494 The eligibility traces are computed with equation (22) in most experiments but the performance  
 495 obtained with *symmetric e-prop* and this simplification were indistinguishable on the evidence  
 496 accumulation task of Fig. 3.

## 497 **Synaptic plasticity rules resulting from *e-prop***

498 An exact computation of the ideal learning signal  $\frac{dE}{dz_j^t}$  in equation (1) requires to back-propagate  
 499 gradients through time (see Fig. 5C). To compute the loss gradients with *e-prop* we replace it  
 500 with the partial derivative  $\frac{\partial E}{\partial z_j^t}$  which can be computed online. Implementing the weight updates  
 501 with gradient descent and learning rate  $\eta$ , all the following plasticity rules are derived from the  
 502 formula

$$\Delta W_{ji}^{\text{rec}} = -\eta \sum_t \frac{\partial E}{\partial z_j^t} e_{ji}^t. \quad (25)$$

503 Note that the weight updates derived for the recurrent weights  $W_{ji}^{\text{rec}}$  also applies to the inputs  
 504 weights  $W_{ji}^{\text{in}}$ . For the output weights and biases the derivation does not rely on the theory of  
 505 *e-prop*, and the weight updates can be found in the Section S3.1.

506 **Case of regression tasks.** In the case of a regression problem with targets  $y_k^{*,t}$  and outputs  $y_k^t$   
 507 defined in equation (8), we define the loss function  $E = \frac{1}{2} \sum_{t,k} (y_k^t - y_k^{*,t})^2$  which results in a  
 508 partial derivative of the form  $\frac{\partial E}{\partial z_j^t} = \sum_k W_{kj}^{\text{out}} \sum_{t' \geq t} (y_k^{t'} - y_k^{*,t'}) \kappa^{t'-t}$ . This seemingly provides  
 509 an obstacle for online learning, because the partial derivative is a weighted sum over future  
 510 errors. But this problem can be resolved as one interchange two sum indices in the expression  
 511 of the weight updates (see section S3.1). It results that the sum over future events transforms  
 512 into a low-pass filtering of the eligibility traces  $\bar{e}_{ji}^t = \mathcal{F}_\kappa(e_{ji}^t)$ , and the resulting weight update  
 513 can be written as

$$\Delta W_{ji}^{\text{rec}} = -\eta \sum_t \underbrace{\left( \sum_k B_{jk}(y_k^t - y_k^{*,t}) \right)}_{=L_j^t} \bar{e}_{ji}^t. \quad (26)$$

514 Here,  $B_{jk}$  denote broadcast weights in analogy to (Lillicrap *et al.*, 2016), where we note that  
 515  $B_{jk} = W_{kj}^{\text{out}}$  as the ideal values.

516 **Case of classification tasks.** We assume that  $K$  target categories are provided in the form of a  
 517 one-hot encoded vector  $\pi^{*,t}$  with  $K$  dimensions. We define the probability for class  $k$  predicted  
 518 by the network as  $\pi_k^t = \text{softmax}_k(y_1^t, \dots, y_K^t) = \exp(y_k^t) / \sum_{k'} \exp(y_{k'}^t)$ , and the loss function  
 519 for classification tasks as the cross-entropy error  $E = - \sum_{t,k} \pi_k^{*,t} \log \pi_k^t$ . The plasticity rule  
 520 resulting from *e-prop* reads (see derivation in Section S3.1):

$$\Delta W_{ji}^{\text{rec}} = -\eta \sum_t \underbrace{\left( \sum_k B_{jk} (\pi_k^t - \pi_k^{*,t}) \right)}_{=L_j^t} \bar{e}_{ji}^t. \quad (27)$$

### 521 **Reward-based e-prop: application of e-prop to policy gradient RL**

522 For reinforcement learning, the network interacts with an external environment. Based on the  
 523 observations  $\mathbf{x}^t$  that are perceived, the network has to commit to actions  $\mathbf{a}^{t_0}, \dots, \mathbf{a}^{t_n}, \dots$  at  
 524 certain decision times  $t_0, \dots, t_n, \dots$ . Each action  $\mathbf{a}^{t_n}$  is sampled from a probability distribution  
 525  $\pi(\mathbf{a}^{t_n}; \mathbf{y}^{t_n})$  which is also referred to as the policy of the RL agent. The policy is defined as  
 526 function of the network output  $\mathbf{y}^{t_n}$ , and is chosen here to be a vector of Gaussians with means  
 527  $\mathbf{y}^t$  and variance  $\sigma^2$  (see section S5.1 for discrete actions). At any time  $t$  the environment can  
 528 provide a positive or negative reward  $r^t$ .

529 The goal of reinforcement learning is to maximize the expected sum of discounted future  
 530 rewards (also called a return):  $R^t = \sum_{t' \geq t} \gamma^{t'-t} r^{t'}$ , where  $\gamma \leq 1$  is a discount factor. That is,  
 531 we want to maximize  $\mathbb{E}[R^t]$ , where the expectation is taken over the agent actions  $\mathbf{a}^t$  and all  
 532 stochastic variables of the agent and the environment. We approach this optimization problem  
 533 using the theory of the actor-critic variant of policy gradient algorithms (Sutton and Barto,  
 534 2018). It involves the policy  $\pi$  (the actor) and an additional output neuron  $V^t$  which predict the

535 value function  $\mathbb{E}[R^t]$  (the critic). The loss function of this algorithm is defined as

$$E = E_\pi + C_V E_V, \quad (28)$$

536 where  $E_\pi = -\sum_n R^{tn} \log \pi(\mathbf{a}^{tn}; \mathbf{y}^{tn})$  measures the performance of the stochastic policy  $\pi$ ,  
 537 and  $E_V = \sum_t \frac{1}{2} (R^t - V^t)^2$  measures the accuracy of  $V^t$ . Unlike in the supervised learning  
 538 case, we do not derive the weight update using the derivative  $\frac{\partial E_\pi}{\partial z_j^t}$  as in equation (25), because  
 539 it is known to have a high variance in this setting. Instead, we replace it with the estimator  $\widehat{\frac{\partial E}{\partial z_j^t}}$   
 540 which has the same value in expectation but a lower variance, as in (Mnih et al., 2016):

$$\widehat{\frac{\partial E}{\partial z_j^t}} = -\sum_n (R^{tn} - V^{tn}) \frac{\partial \log \pi(\mathbf{a}^{tn}; \mathbf{y}^{tn})}{\partial z_j^t} + C_V \frac{\partial E_V}{\partial z_j^t}. \quad (29)$$

541 We describe below the resulting synaptic plasticity rule in the case of multiple continuous ac-  
 542 tions as needed to solve the task of Fig. 4. For the case of a single discrete actions as used in  
 543 Fig. S4 we refer to section S5.1.

544 **Case of continuous actions.** This task is more difficult when there is a delay between the  
 545 action and the reward or, even harder, when a sequence of many actions lead together to a  
 546 delayed reward. There the loss function  $E$  cannot be computed online because the evaluation of  
 547  $R^{tn}$  requires knowledge of future rewards. To overcome this, we introduce temporal difference  
 548 errors  $\delta^t = r^t + \gamma V^{t+1} - V^t$  (see Fig. S3), and use the equivalence between the forward and  
 549 backward view in reinforcement learning (Sutton and Barto, 2018) to arrive at the following  
 550 synaptic plasticity rules for a general actor-critic algorithm with *e-prop* (see Section S5.1):

$$\Delta W_{ji}^{\text{rec}} = -\eta \sum_t \delta^t \mathcal{F}_\gamma \left( L_j^t \bar{e}_{ji}^t \right) \quad \text{for} \quad (30)$$

$$L_j^t = -C_V B_j^V + \sum_k B_{jk}^a \frac{y_k^t - a_k^t}{\sigma^2}, \quad (31)$$

551 where we define the term  $y_k^t - a_k^t$  to have value zero when no action is taken at time  $t$ . The  
 552 combination of reward prediction error and neuron-specific learning signal was also used in

553 a plasticity rule for feedforward networks inspired by neuroscience (*Roelfsema and Holtmaat,*  
554 *2018*), here it arises from the approximation of *BPTT* by *e-prop* in RSNNs solving RL problems.  
555 Note that the filtering  $\mathcal{F}_\gamma$  requires an additional eligibility trace per synapse. This arises from  
556 the temporal difference learning in RL (*Sutton and Barto, 2018*). It depends on the learning  
557 signal and does not have the same function as the eligibility trace  $e_{ji}^t$ .

## 558 **References**

- 559 Allen Institute: Cell Types Database, 2018. Allen Institute: Cell Types Database (2018).  
560 © 2018 Allen Institute for Brain Science. Allen Cell Types Database, cell feature search.  
561 Available from: [celltypes.brain-map.org/data](http://celltypes.brain-map.org/data).
- 562 Bellec et al., 2018. Bellec, G., Salaj, D., Subramoney, A., Legenstein, R., and Maass, W.  
563 (2018). Long short-term memory and learning-to-learn in networks of spiking neurons. In  
564 *NeurIPS 32*.
- 565 Bellec et al., 2019. Bellec, G., Scherr, F., Hajek, E., Salaj, D., Legenstein, R., and Maass, W.  
566 (2019). Biologically inspired alternatives to backpropagation through time for learning in  
567 recurrent neural nets. *arXiv:1901.09049 [cs]*. arXiv: 1901.09049.
- 568 Cassenaer and Laurent, 2012. Cassenaer, S. and Laurent, G. (2012). Conditional modulation  
569 of spike-timing-dependent plasticity for olfactory learning. *Nature*, 482(7383):47.
- 570 Clopath et al., 2010. Clopath, C., Büsing, L., Vasilaki, E., and Gerstner, W. (2010). Connectiv-  
571 ity reflects coding: a model of voltage-based STDP with homeostasis. *Nature Neuroscience*,  
572 13(3):344–52.



- 573 Davies et al., 2018. Davies, M., Srinivasa, N., Lin, T.-H., China, G., Cao, Y., Choday, S. H.,  
574 Dimou, G., Joshi, P., Imam, N., Jain, S., et al. (2018). Loihi: A neuromorphic manycore  
575 processor with on-chip learning. *IEEE Micro*, 38(1):82–99.
- 576 Engelhard et al., 2019. Engelhard, B., Finkelstein, J., Cox, J., Fleming, W., Jang, H. J., Ornelas,  
577 S., Koay, S. A., Thiberge, S. Y., Daw, N. D., Tank, D. W., et al. (2019). Specialized coding of  
578 sensory, motor and cognitive variables in vta dopamine neurons. *Nature*, page 1.
- 579 Esser et al., 2016. Esser, S. K., Merolla, P. A., Arthur, J. V., Cassidy, A. S., Appuswamy, R.,  
580 Andreopoulos, A., Berg, D. J., McKinstry, J. L., Melano, T., Barch, D. R., di Nolfo, C., Datta,  
581 P., Amir, A., Taba, B., Flickner, M. D., and Modha, D. S. (2016). Convolutional networks for  
582 fast, energy-efficient neuromorphic computing. *PNAS*, 113(41):11441–11446.
- 583 Garofolo et al., 1993. Garofolo, J. S., Lamel, L. F., Fisher, W. M., Fiscus, J. G., and Pallett,  
584 D. S. (1993). DARPA TIMIT acoustic-phonetic continuous speech corpus CD-ROM. NIST  
585 speech disc 1-1.1. *NASA STI/Recon Technical Report N*, 93.
- 586 Gerstner et al., 2014. Gerstner, W., Kistler, W. M., Naud, R., and Paninski, L. (2014). *Neuronal*  
587 *dynamics: From single neurons to networks and models of cognition*. Cambridge University  
588 Press.
- 589 Gerstner et al., 2018. Gerstner, W., Lehmann, M., Liakoni, V., Corneil, D., and Brea, J. (2018).  
590 Eligibility Traces and Plasticity on Behavioral Time Scales: Experimental Support of Neo-  
591 Hebbian Three-Factor Learning Rules. *Frontiers in Neural Circuits*, 12.
- 592 Gouwens et al., 2018. Gouwens, N. W., Berg, J., Feng, D., Sorensen, S. A., Zeng, H., Hawry-  
593 lycz, M. J., Koch, C., and Arkhipov, A. (2018). Systematic generation of biophysically de-  
594 tailed models for diverse cortical neuron types. *Nature communications*, 9(1):710.

- 595 Graves et al., 2013. Graves, A., Mohamed, A.-R., and Hinton, G. (2013). Speech recognition  
596 with deep recurrent neural networks. In *ICASSP*, pages 6645–6649.
- 597 Greff et al., 2017. Greff, K., Srivastava, R. K., Koutník, J., Steunebrink, B. R., and Schmidhu-  
598 ber, J. (2017). Lstm: A search space odyssey. *IEEE TNNLS*, 28(10):2222–2232.
- 599 Huh and Sejnowski, 2018. Huh, D. and Sejnowski, T. J. (2018). Gradient descent for spiking  
600 neural networks. In *NeurIPS*, pages 1433–1443.
- 601 Jaderberg et al., 2016. Jaderberg, M., Czarnecki, W. M., Osindero, S., Vinyals, O., Graves,  
602 A., Silver, D., and Kavukcuoglu, K. (2016). Decoupled neural interfaces using synthetic  
603 gradients. *arXiv preprint arXiv:1608.05343*.
- 604 Kappel et al., 2018. Kappel, D., Legenstein, R., Habenschuss, S., Hsieh, M., and Maass, W.  
605 (2018). A dynamic connectome supports the emergence of stable computational function of  
606 neural circuits through reward-based learning. *eNeuro*.
- 607 LeCun et al., 2015. LeCun, Y., Bengio, Y., and Hinton, G. (2015). Deep learning. *nature*,  
608 521(7553):436.
- 609 Lillicrap et al., 2016. Lillicrap, T. P., Cownden, D., Tweed, D. B., and Akerman, C. J. (2016).  
610 Random synaptic feedback weights support error backpropagation for deep learning. *Nature*  
611 *Communications*, 7:13276.
- 612 Lillicrap and Santoro, 2019. Lillicrap, T. P. and Santoro, A. (2019). Backpropagation through  
613 time and the brain. *Current Opinion in Neurobiology*, 55:82–89.
- 614 MacLean et al., 2015. MacLean, S. J., Hassall, C. D., Ishigami, Y., Krigolson, O. E., and Es-  
615 kes, G. A. (2015). Using brain potentials to understand prism adaptation: the error-related  
616 negativity and the p300. *Frontiers in human neuroscience*, 9:335.

- 617 Mnih et al., 2016. Mnih, V., Badia, A. P., Mirza, M., Graves, A., Lillicrap, T., Harley, T., Silver,  
618 D., and Kavukcuoglu, K. (2016). Asynchronous methods for deep reinforcement learning. In  
619 *ICML*, pages 1928–1937.
- 620 Morcos and Harvey, 2016. Morcos, A. S. and Harvey, C. D. (2016). History-dependent vari-  
621 ability in population dynamics during evidence accumulation in cortex. *Nature Neuroscience*,  
622 19(12):1672.
- 623 Mujika et al., 2018. Mujika, A., Meier, F., and Steger, A. (2018). Approximating real-time  
624 recurrent learning with random kronecker factors. In *NeurIPS*, pages 6594–6603.
- 625 Murray, 2019. Murray, J. M. (2019). Local online learning in recurrent networks with random  
626 feedback. *eLife*, 8:e43299.
- 627 Nicola and Clopath, 2017. Nicola, W. and Clopath, C. (2017). Supervised learning in spiking  
628 neural networks with force training. *Nature Communications*, 8(1):2208.
- 629 Nøkland, 2016. Nøkland, A. (2016). Direct feedback alignment provides learning in deep neu-  
630 ral networks. In *NIPS*, pages 1037–1045.
- 631 Pozzorini et al., 2015. Pozzorini, C., Mensi, S., Hagens, O., Naud, R., Koch, C., and Gerst-  
632 ner, W. (2015). Automated high-throughput characterization of single neurons by means of  
633 simplified spiking models. *PLoS computational biology*, 11(6):e1004275.
- 634 Roelfsema and Holtmaat, 2018. Roelfsema, P. R. and Holtmaat, A. (2018). Control of synaptic  
635 plasticity in deep cortical networks. *Nature Reviews Neuroscience*, 19(3):166–180.
- 636 Roeper, 2013. Roeper, J. (2013). Dissecting the diversity of midbrain dopamine neurons.  
637 *Trends in neurosciences*, 36(6):336–342.

- 638 Roth et al., 2019. Roth, C., Kanitscheider, I., and Fiete, I. (2019). Kernel rnn learning (kernl).  
639 *ICLR*.
- 640 Runyan et al., 2017. Runyan, C. A., Piasini, E., Panzeri, S., and Harvey, C. D. (2017). Distinct  
641 timescales of population coding across cortex. *Nature*, 548:92–96.
- 642 Sajad et al., 2019. Sajad, A., Godlove, D. C., and Schall, J. D. (2019). Cortical microcircuitry  
643 of performance monitoring. *Nature Neuroscience*, 22(2):265.
- 644 Sanhueza and Lisman, 2013. Sanhueza, M. and Lisman, J. (2013). The camkii/nmdar complex  
645 as a molecular memory. *Molecular brain*, 6(1):10.
- 646 Sutton and Barto, 2018. Sutton, R. S. and Barto, A. G. (2018). *Reinforcement Learning: An*  
647 *Introduction*. MIT press.
- 648 Tallec and Ollivier, 2018. Tallec, C. and Ollivier, Y. (2018). Unbiased online recurrent opti-  
649 mization. *ICLR*.
- 650 Werbos, 1990. Werbos, P. J. (1990). Backpropagation through time: what it does and how to  
651 do it. *Proceedings of the IEEE*, 78(10):1550–1560.
- 652 Williams and Zipser, 1989. Williams, R. J. and Zipser, D. (1989). A learning algorithm for  
653 continually running fully recurrent neural networks. *Neural Computation*, 1(2):270–280.
- 654 Yagishita et al., 2014. Yagishita, S., Hayashi-Takagi, A., Ellis-Davies, G. C., Urakubo, H.,  
655 Ishii, S., and Kasai, H. (2014). A critical time window for dopamine actions on the struc-  
656 tural plasticity of dendritic spines. *Science*, 345(6204):1616–1620.
- 657 Zenke and Ganguli, 2018. Zenke, F. and Ganguli, S. (2018). Superspike: Supervised learning  
658 in multilayer spiking neural networks. *Neural computation*, 30(6):1514–1541.

## 659 **Acknowledgments**

660 This research/project was supported by the Human Brain Project (Grand Agreement number  
661 785907) and the SYNCH project (Grand Agreement number 824162) of the European Union.  
662 We gratefully acknowledge the support of NVIDIA Corporation with the donation of the Quadro  
663 P6000 GPU used for this research. Computations were carried out on the Human Brain Project  
664 PCP Pilot Systems at the Juelich Supercomputing Centre, which received co-funding from  
665 the European Union (Grand Agreement number 604102) and on the Vienna Scientific Clus-  
666 ter (VSC).

667 We thank Thomas Bohnstingl, Wulfram Gerstner, Christopher Harvey, Martin Vinck, Jason  
668 MacLean, Adam Santoro, Christopher Summerfield, and Yuqing Zhu for helpful comments on  
669 an earlier version of the manuscript.

## 670 **Supplementary materials**

671 Supplementary Text

672 Figs. S1 to S5

673 Movies S1 to S6

674



|    |                                                                                                 |           |
|----|-------------------------------------------------------------------------------------------------|-----------|
| 23 | <b>S4 Applying supervised learning with <i>e-prop</i> to artificial neural networks (LSTMs)</b> | <b>18</b> |
| 24 | S4.1 Speech recognition with LSTM networks and <i>e-prop</i> . . . . .                          | 19        |
| 25 | S4.2 Simulation details: speech recognition task with LSTMs (Fig. S2) . . . . .                 | 19        |
| 26 | S4.2.1 Frame-wise phoneme classification with LSTM networks . . . . .                           | 19        |
| 27 | S4.2.2 Phoneme sequence recognition with CTC and LSTM networks . . . . .                        | 20        |
| 28 | S4.3 LSTM network model . . . . .                                                               | 20        |
| 29 | S4.4 Eligibility traces for LSTM units . . . . .                                                | 21        |
| 30 | <b>S5 Reward-based <i>e-prop</i>: Application of <i>e-prop</i> to policy gradient RL</b>        | <b>22</b> |
| 31 | S5.1 Synaptic plasticity rules for <i>reward-based e-prop</i> . . . . .                         | 22        |
| 32 | S5.2 Simulation details: evidence accumulation task (Fig. S4) . . . . .                         | 27        |
| 33 | S5.3 Simulation details: delayed arm reaching task (Fig. 4) . . . . .                           | 27        |
| 34 | <b>S6 Evaluation of four variations of <i>e-prop</i> (Fig. S5)</b>                              | <b>30</b> |
| 35 | S6.1 A truncated eligibility trace for LIF neurons . . . . .                                    | 30        |
| 36 | S6.2 Global broadcast weights . . . . .                                                         | 31        |
| 37 | S6.3 Temporally local broadcast weights . . . . .                                               | 31        |
| 38 | S6.4 Replacing the eligibility trace by the corresponding term of the Clopath rule . . . . .    | 31        |
| 39 | S6.5 Simulation details: pattern generation task . . . . .                                      | 32        |

## 40 S1 Eligibility traces

41 Eligibility traces have been introduced in Section “Mathematical basis for e-prop” in Results.  
 42 Here, we provide further information on eligibility traces. In Section S1.1, we discuss an alter-  
 43 native view on eligibility traces as derivatives. Second, we extend in Section S1.3 our treatment  
 44 of eligibility traces for LSNNs in Methods to include non-uniform synaptic delays.

### 45 S1.1 Viewing eligibility traces as derivatives

46 There exists an alternative definition of the eligibility traces that is perhaps more intuitive than  
 47 the recursive equation in (19). For this we need to define a notion of derivative  $\frac{\tilde{\partial} \mathbf{h}_j^t}{\partial W_{ji}}$  that quan-  
 48 tifies the influence of an infinitesimal change of  $W_{ji}$  on the hidden state  $\mathbf{h}_j^t$  through the internal  
 49 processes of neuron  $j$ . Unlike the partial derivative  $\frac{\partial \mathbf{h}_j^t}{\partial W_{ji}}$  it takes the full neuron history into  
 50 account and not only the update of the hidden state at time step  $t$ . In comparison to the to-  
 51 tal derivative  $\frac{d \mathbf{h}_j^t}{d W_{ji}}$  it ignores that a spike of neuron  $j$  might influence its future self through  
 52 the recurrent connections. Defining the derivative  $\frac{\tilde{\partial} z_j^t}{\partial W_{ji}}$  according to the same principles, the  
 53 eligibility traces and eligibility vectors can be defined by:

$$\epsilon_{ji}^t = \frac{\tilde{\partial} \mathbf{h}_j^t}{\partial W_{ji}} \quad (\text{S1})$$

$$e_{ji}^t = \frac{\tilde{\partial} z_j^t}{\partial W_{ji}}. \quad (\text{S2})$$

54 More formally,  $\frac{\tilde{\partial} \mathbf{h}_j^t}{\partial W_{ji}}$  is the total derivative computed in the computational graph where the cross  
 55 neuron dependencies are ignored, i.e. where  $\frac{\partial \mathbf{h}_j^t}{\partial z_i^{t-1}}$  and  $\frac{\partial z_j^t}{\partial z_i^{t-1}}$  are assumed to be zero for all  $i, j$   
 56 and  $t$ . This definition is equivalent to the previous one because, when inter neuron dependencies  
 57 are ignored, the gradient  $\frac{\tilde{\partial} \mathbf{h}_j^{t'}}{\partial W_{ji}}$  is given by the sum  $\sum_{t \leq t'} \frac{\tilde{\partial} \mathbf{h}_j^{t'}}{\partial \mathbf{h}_j^t} \frac{\partial \mathbf{h}_j^t}{\partial W_{ji}}$  and one recognizes here the  
 58 eligibility vector given in equation (17). Equation (S2) follows since  $e_{ji}^t = \frac{\partial z_j^t}{\partial \mathbf{h}_j^t} \cdot \epsilon_{ji}^t = \frac{\tilde{\partial} z_j^t}{\partial W_{ji}}$ . By  
 59 extension of this notation of derivative to other quantities one can summarize *symmetric e-prop*



60 as the replacement of  $\frac{dE}{dW_{ji}}$  by  $\frac{\tilde{\partial}E}{\partial W_{ji}}$  in stochastic gradient descent.

## 61 **S1.2 Eligibility traces for LSNNs with membrane potential reset**

62 The eligibility traces derived in the methods do not take the reset term into account. We derive  
 63 here the eligibility traces that can correct for this. Note however that we did not observe an  
 64 improvement when using this more complex model on the speech recognition and evidence  
 65 accumulation tasks.

66 **Eligibility traces for LIF neurons.** When taking into account the reset, the partial derivative  
 67  $\frac{\partial h_j^{t+1}}{\partial h_j^t}$  becomes  $\alpha - v_{\text{thr}}\psi_j^t$  instead of  $\alpha$  and, accordingly to equation (19), the eligibility vector  
 68 can be computed with the recursive formula:  $\epsilon_{ji}^{t+1} = (\alpha - \beta\psi_j^t)\epsilon_{ji}^t + z_j^t$ .

69 **Eligibility traces for ALIF neurons.** According to the dynamics of the ALIF neurons defined  
 70 in equations (3)–(7) one coefficient differs in the matrix  $\frac{\partial h_j^{t+1}}{\partial h_j^t} \in \mathbb{R}^{2 \times 2}$  as soon as one takes the  
 71 reset into account. The coefficient  $\frac{\partial v_j^t}{\partial a_j^t}$  was 0 without reset and becomes now  $v_{\text{thr}}\beta\psi_j^t$ . Overall  
 72 the full derivative  $\frac{\partial h_j^{t+1}}{\partial h_j^t}$  is then equal to:

$$\frac{\partial h_j^{t+1}}{\partial h_j^t} = \begin{pmatrix} \alpha - v_{\text{thr}}\psi_j^t & v_{\text{thr}}\beta\psi_j^t \\ \psi_j^t & \rho - \beta\psi_j^t \end{pmatrix}. \quad (\text{S3})$$

73 Even-though this algorithm is still practicable, the recursive propagation of the eligibility vector  
 74 in equation (19) cannot be written in the form of two separable equations as done in equations  
 75 (22) and (23). We preferred to ignore the reset in Methods to provide more interpretable equa-  
 76 tions for eligibility traces.

## 77 **S1.3 Eligibility traces for LSNNs with non-uniform synaptic delays**

78 In our derivation of eligibility traces for LSNNs, we used uniform synaptic delays to ease no-  
 79 tation. Here, we detail how *e-prop* can be extended to non-uniform delays. Resulting rules

80 for synaptic plasticity favor then corresponding larger delays of several ms between pre- and  
 81 post-synaptic firing. Let the delay of a synapse from neuron  $i$  to  $j$  be denoted by  $c(j, i) > 0$ .  
 82 Similarly, let  $d(j, i) \geq 0$  be the delay of a synapse that connects an input neuron  $i$  with neuron  
 83  $j$ . Using this definition, the dynamics of the membrane potential, see equation (3), is written as:

$$v_j^{t+1} = \alpha v_j^t + \sum_{i \neq j} W_{ji}^{\text{rec}} z_i^{t+1-c(j,i)} + \sum_i W_{ji}^{\text{in}} x_i^{t+1-d(j,i)} - z_j^t v_{\text{th}}. \quad (\text{S4})$$

84 Like in the uniform delay case, we obtain  $\frac{\partial v_j^{t+1}}{\partial v_j^t} = \alpha$ . The difference for arbitrary delays be-  
 85 comes visible in  $\frac{\partial v_j^t}{\partial W_{ji}^{\text{rec}}} = z_i^{t-c(j,i)}$  and in  $\frac{\partial v_j^t}{\partial W_{ji}^{\text{in}}} = x_i^{t-d(j,i)}$ . For recurrent weights, the component  
 86 of the eligibility vector associated to the membrane potential is hence:

$$\epsilon_{ji,v}^t = \sum_{t' \leq t-c(j,i)} z_i^{t'} = \bar{z}_i^{t-c(j,i)}. \quad (\text{S5})$$

87 As the dynamics of the threshold adaptation is unchanged, the update of  $\epsilon_{ji,a}^t$  remains as given  
 88 in equation (22). We obtain an eligibility trace

$$e_{ji}^t = \psi_j^t \left( \bar{z}_i^{t-c(j,i)} - \beta \epsilon_{ji,a}^t \right). \quad (\text{S6})$$

89 Analogously, we obtain the corresponding eligibility trace for input synapses by replacing  $z_i^t$   
 90 and  $c(j, i)$  with  $x_i^t$  and  $d(j, i)$  respectively.

## 91 **S2 Optimization and regularization procedures**

92 Here, we discuss how optimization of networks was implemented and techniques that were used  
 93 to regularize networks.

### 94 **S2.1 Optimization procedure**

95 For *e-prop* and for *BPTT*, the weights were updated once after a batch of training trials. For  
 96 simplicity, all the weight updates  $\Delta W_{ji}^{\text{rec}}$  are written for the most basic version of stochastic

97 gradient descent ( $\Delta W_{ji}^{\text{rec}} = -\eta \widehat{\frac{dE}{dW_{ji}^{\text{rec}}}}$ , where  $\widehat{\frac{dE}{dW_{ji}^{\text{rec}}}}$  is the gradient estimate) in this article. In  
 98 practice, we used Adam (Kingma and Ba, 2014) to boost stochastic gradient descent. We refer  
 99 to (Kingma and Ba, 2014) for the computation of the weight updates that result from the gradient  
 100 estimates.

## 101 S2.2 Firing rate regularization for LSNNs

102 To ensure a low firing rate in LSNNs, we added a regularization term  $E_{\text{reg}}$  to the loss function  
 103  $E$ . This regularization term had the form:

$$E_{\text{reg}} = \frac{1}{2} \sum_j (f_j^{\text{av}} - f^{\text{target}})^2, \quad (\text{S7})$$

104 where  $f^{\text{target}}$  is a target firing rate and  $f_j^{\text{av}} = \frac{1}{n_{\text{trials}}T} \sum_t z_j^t$  is the average firing rate of neuron  
 105  $j$ . Here, the sum runs over the time steps of all the  $n_{\text{trials}}$  trials between two weight updates.  
 106 To derive the plasticity rule that implements this regularization, we follow equation (25) in  
 107 Methods. The partial derivative of the regularization loss has the form:

$$\frac{\partial E_{\text{reg}}}{\partial z_j^t} = \frac{1}{n_{\text{trials}}T} (f_j^{\text{av}} - f^{\text{target}}). \quad (\text{S8})$$

108 Inserting this expression into equation (25), we obtain the plasticity rule that implements the  
 109 regularization:

$$\Delta W_{ji}^{\text{rec}} = \eta C_{\text{reg}} \sum_t \frac{1}{n_{\text{trials}}T} (f^{\text{target}} - f_j^{\text{av}}) e_{ji}^t, \quad (\text{S9})$$

110 where  $C_{\text{reg}}$  is a positive coefficient that controls the strength of the regularization. This plasticity  
 111 rule is applied simultaneously together with the plasticity rule that minimizes the loss  $E$ . Note  
 112 that this weight update fits the *e-prop* framework provided by equation (1) with a learning signal  
 113  $L_j^{\text{reg},t}$  proportional to  $f^{\text{target}} - f_j^{\text{av}}$  available locally at neuron  $j$ . This learning signal  $L_j^{\text{reg},t}$  can  
 114 simply be added to the task-specific learning signal  $L_j^t$ .

### 115 **S2.3 Weight decay regularization**

116 When using *adaptive e-prop*, readout and broadcast weights were regularized using L2 norm  
117 weight decay regularization. This was implemented by subtracting  $C_{\text{decay}} \cdot W$  from each weight  
118  $W$  that was regularized at each weight update, where  $C_{\text{decay}} > 0$  is the regularization factor  
119 (see specific experiments for the value of  $C_{\text{decay}}$ ). This weight decay in combination with the  
120 mirroring of the weight updates has the effect that, despite different initialization, the output  
121 weights and the adaptive broadcast weights converge to similar values. The remaining differ-  
122 ence of performance between *symmetric* and *adaptive e-prop* reported in Fig. 2 and Fig. S2 may  
123 be explained by the different initializations.

### 124 **S2.4 Optimization with rewiring for sparse network connectivity**

125 Due to limited resources, neural networks in the brain and in neuromorphic hardware are sparsely  
126 connected. In addition, the connectivity structure of brain networks is dynamic, with synaptic  
127 connections being added and deleted on the time scale of hours or days, which was shown to  
128 help the network to use the limited connectivity resources in an optimal manner (*Kappel et al.*,  
129 2018). In order to test whether *e-prop* is compatible with synaptic rewiring, we combined it with  
130 DEEP R (*Bellec et al.*, 2018). DEEP R is based on a model for synaptic rewiring in the brain  
131 (*Kappel et al.*, 2018) and allows to rewire sparse neural network models during training with  
132 gradients descent. The algorithm minimizes the loss function  $E$  subject to a constraint on the  
133 total number of connected synapses. To do so, each synaptic weight  $W_{ji}$  is assigned a fixed sign  
134  $s_{ji}$  (it is defined to be excitatory or inhibitory) and an amplitude  $w_{ji}$ . Each potential synaptic  
135 connection can either be “active”, i.e., the synaptic connection is realized, or “dormant”, i.e.,  
136 this potential connection is not realized.

137 For a dormant synaptic connection, the weight  $W_{ji}$  is set to be zero and the gradients and  
138 weight updates of the connection  $i \rightarrow j$  are not computed. It means in *e-prop* that dor-

139 mant synapses do not require eligibility traces. For an active connection, the weight is de-  
140 fined as  $W_{ji} = s_{ji}w_{ji}$  and the weight amplitude is updated according to the update  $\Delta w_{ji} =$   
141  $s_{ji}\Delta W_{ji} - \eta C_{L1}$  where  $\Delta W_{ji}$  is the weight update given here by *e-prop* and  $C_{L1} = 0.01$  is an  
142 *L1* regularization coefficient. To update the network structure such that the set of active con-  
143 nections is optimized along side their synaptic weights, DEEP R proceeds as follows after each  
144 weight update:

- 145 • every active connection for which the amplitude becomes negative is set to be dormant,
- 146 • and some dormant connections are selected randomly and set to be active with  $w_{ji} = 0$   
147 such that the total number of active connection remains constant.

148 We define the synapse signs  $s_{ji}$  such that 80% of the neurons are excitatory and 20% are in-  
149 hibitory. Despite the constraint on the neuron signs and the constraint that 90% of the synapses  
150 should remain dormant throughout the learning process, *e-prop* and rewiring solve the evidence  
151 accumulation task of Fig. 3.

## 152 **S3 Supervised learning with *e-prop***

### 153 **S3.1 Synaptic plasticity rules for *e-prop* in supervised learning**

154 Here, we derive synaptic plasticity rules that result from *e-prop* for supervised learning. We  
155 consider two cases: First, we derive plasticity rules for regression tasks, and second, for classi-  
156 fication tasks.

157 We follow the scheme described by equation (25) in Methods. Hence the loss gradients  $\frac{dE}{dW_{ji}}$   
158 are estimated using the approximation  $\widehat{\frac{dE}{dW_{ji}}} \stackrel{\text{def}}{=} \sum_t \frac{\partial E}{\partial z_j^t} e_{ji}^t$ . Given the eligibility traces that are  
159 derived in Methods and Section S4.4, what remains to be derived for each task is the expression  
160 of the relevant derivative  $\frac{\partial E}{\partial z_j^t}$  and show that it can be computed online.

161 **Regression tasks:** Consider a regression problem with loss function  $E = \frac{1}{2} \sum_{t,k} (y_k^t - y_k^{*,t})^2$ ,  
 162 targets  $y_k^{*,t}$  and outputs  $y_k^t$  as defined in equation (8). The partial derivative  $\frac{\partial E}{\partial z_j^t}$  takes the form:

$$E = \frac{1}{2} \sum_{t,k} (y_k^t - y_k^{*,t})^2 \quad (\text{S10})$$

$$\frac{\partial E}{\partial z_j^t} = \sum_k W_{kj}^{\text{out}} \sum_{t' \geq t} (y_k^{t'} - y_k^{*,t'}) \kappa^{t'-t}. \quad (\text{S11})$$

163 This seemingly provides an obstacle for online learning, because the partial derivative is a  
 164 weighted sum over future errors. But this problem can be resolved. Following equation (1),  
 165 the approximation  $\widehat{\frac{dE}{dW_{ji}}}$  of the loss gradient is computed with *e-prop* as follows (we insert  $\frac{\partial E}{\partial z_j^t}$   
 166 in place of the total derivative  $\frac{dE}{dz_j^t}$ ):

$$\widehat{\frac{dE}{dW_{ji}}} = \sum_{t'} \frac{\partial E}{\partial z_j^{t'}} e_{ji}^{t'} \quad (\text{S12})$$

$$= \sum_{k,t'} W_{kj}^{\text{out}} \sum_{t \geq t'} (y_k^t - y_k^{*,t}) \kappa^{t-t'} e_{ji}^{t'} \quad (\text{S13})$$

$$= \sum_{k,t} W_{kj}^{\text{out}} (y_k^t - y_k^{*,t}) \underbrace{\sum_{t' \leq t} \kappa^{t-t'} e_{ji}^{t'}}_{\stackrel{\text{def}}{=} e_{ji}^t}, \quad (\text{S14})$$

167 where we changed the order of summations in the last line. The second sum indexed by  $t'$  is  
 168 now over previous events that can be computed online. It is just a low-pass filtered version  
 169 of the eligibility trace  $e_{ji}^t$ . With this additional filtering of the eligibility trace with a time  
 170 constant equal to that of the leak of output neurons, we see that *e-prop* takes into account the  
 171 latency between an event at time  $t'$  and its impact on later errors at time  $t$  within the integration  
 172 time window of the output neuron. Hence, implementing weight updates with gradient descent  
 173 and learning rate  $\eta$ , the plasticity rule resulting from *e-prop* is given by the equation (26). The  
 174 gradient of the loss function with respect to the output weights  $\frac{dE}{dW_{kj}^{\text{out}}}$  can be implemented online  
 175 without relying on the theory of *e-prop*. The plasticity rule resulting from gradient descent is

176 directly:

$$\Delta W_{kj}^{\text{out}} = -\eta \sum_t (y_k^t - y_k^{*,t}) \mathcal{F}_\kappa(z_j^t). \quad (\text{S15})$$

177 Similarly the update of the bias of the output neurons is  $\Delta b_k^{\text{out}} = -\eta \sum_t (y_k^t - y_k^{*,t})$ .

178 **Classification tasks:** We assume that  $K$  target categories are provided in the form of a  $K$ -  
 179 dimensional one-hot encoded vector  $\pi^{*,t}$ . To train recurrent networks in this setup, we replace  
 180 the mean squared error by the cross entropy loss:

$$E = - \sum_{t,k} \pi_k^{*,t} \log \pi_k^t, \quad (\text{S16})$$

181 where the probability for class  $k$  predicted by the network is given as  $\pi_k^t = \text{softmax}_k(y_1^t, \dots, y_K^t)$   
 182  $= \exp(y_k^t) / \sum_{k'} \exp(y_{k'}^t)$ . To derive the modified learning rule that results from this loss func-  
 183 tion  $E$ , we replace  $\frac{\partial E}{\partial z_j^t}$  of equation (S11) with the corresponding one resulting from (S16):

$$\frac{\partial E}{\partial z_j^t} = \sum_k W_{kj}^{\text{out}} \sum_{t' \geq t} (\pi_k^{t'} - \pi_k^{*,t'}) \kappa^{t'-t}. \quad (\text{S17})$$

184 Following otherwise the same derivation as in equations (S12)-(S14), the plasticity rule in the  
 185 case of classification tasks is given by equation (27).

186 Similarly, one obtains the plasticity rule for the output connections, where the only differ-  
 187 ence between the cases of regression and of classification is that the output  $y_k^t$  and the target  $y_k^{*,t}$   
 188 are replaced by  $\pi_k^t$  and  $\pi_k^{*,t}$  respectively:  $\Delta W_{kj}^{\text{out}} = -\eta \sum_t (\pi_k^t - \pi_k^{*,t}) \mathcal{F}_\kappa(z_j^t)$ . The update of the  
 189 bias of the output neurons is  $\Delta b_k^{\text{out}} = -\eta \sum_t (\pi_k^t - \pi_k^{*,t})$ .

## 190 **S3.2 Simulation details: speech recognition task (Fig. 2)**

### 191 **S3.2.1 Frame-wise phoneme classification**

192 The goal of the frame-wise setup of the task is to classify audio-frames into phoneme classes.  
 193 Every input sequence of audio-frames has a corresponding sequence of class labels of the same

194 length, hence the model does not need to align the input sequence to the target sequence. This  
195 task has been widely adopted as a speech recognition benchmark for recurrent neural networks  
196 (RNNs).

197 **Details of the network model:** We used a bi-directional network architecture (*Graves and*  
198 *Schmidhuber, 2005*), where the output of an LSNN was augmented by the output a second  
199 LSNN that received the input sequence in reverse time order. Each of the two networks con-  
200 sisted of 300 LIF neurons and 100 ALIF neurons. The neurons in the LSNNs had a membrane  
201 time constant of  $\tau_m = 20$  ms, an adaptation time constant of  $\tau_a = 200$  ms, an adaptation  
202 strength of  $\beta = 0.184$ , a baseline threshold  $v_{th} = 1.6$ , and a refractory period of 2 ms.

203 We used 61 output neurons in total, one for each class of the TIMIT dataset. The mem-  
204 brane time constant of the output neurons was  $\tau_{out} = 3$  ms. A softmax was applied to their  
205 output, resulting in the corresponding class probabilities. The network model had  $\approx 0.4$  million  
206 weights.

207 **Details of the dataset preparation and of the input preprocessing:** We followed the same  
208 task setup as in (*Greff et al., 2017, Graves and Schmidhuber, 2005*). The TIMIT dataset was split  
209 according to Halberstadt (*Glass et al., 1999*) into a training, validation, and test set with 3696,  
210 400, and 192 sequences respectively. The input  $\mathbf{x}^t$  was given as preprocessed audio that was  
211 obtained by the following procedure: computation of 13 Mel Frequency Cepstral Coefficients  
212 (MFCCs) with a frame size of 10 ms on an input window of length 25 ms, computation of the  
213 first and the second derivatives of MFCCs, concatenation of all computed factors. The 39 input  
214 channels were mapped to the range  $[0, 1]$  according to the minimum/maximum values in the  
215 training set.

216 In order to map the inputs into the temporal time domain of LSNNs, each preprocessed  
217 audio frame was fed as inputs  $\mathbf{x}^t$  to the LSNN for 5 consecutive 1 ms steps.



218 **Details of the learning procedure:** All networks were trained for a maximum of 80 epochs,  
219 where we used early stopping to report the test error at the point of the lowest error on the  
220 validation set. Weight updates were implemented using Adam with default hyperparameters  
221 (Kingma and Ba, 2014) except for  $\epsilon_{\text{Adam}}$ , which was set to  $10^{-5}$ . Gradients were computed  
222 using batches of size 32. We used L2 regularization in all networks by adding the term  $10^{-5} \cdot$   
223  $\|W\|^2$  to the loss function, where  $W$  denotes all weights in the network. The learning rate was  
224 initialized to 0.01 and fixed during training. For *random e-prop* and *adaptive e-prop*, broadcast  
225 weights  $B_{jk}$  were initialized using a Gaussian distribution with a mean of 0 and a variance of  
226 1 and  $1/n$  respectively. In *adaptive e-prop*, we used in addition to the weight decay described  
227 above L2 weight decay on readout and broadcast weights according to S2.3 using a factor  
228 of  $C_{\text{decay}} = 10^{-2}$ . Firing rate regularization, as described in Section S2.2, was applied with  
229  $C_{\text{reg}} = 50$ .

### 230 **S3.2.2 Phoneme sequence recognition with CTC**

231 We compared *e-prop* and *BPTT* on the task and the network architecture used in (Graves et al.,  
232 2013). The essential building blocks of this architecture were also used in (Amodei et al.,  
233 2016) for developing commercial software for speech-to-text transcriptions. In this architecture  
234 Connectionist Temporal Classification (CTC) is employed. This enabled us to train networks on  
235 unaligned sequence labeling tasks end-to-end. We considered the results of (Graves et al., 2013)  
236 that were obtained with three layers of bi-directional LSTMs, CTC, and *BPTT* as a reference.  
237 We are aware that this configuration cannot be adapted to an online implementation easily, due  
238 to the usage of a bi-directional LSTM and the CTC loss function. However, we believe that this  
239 task is still relevant to compare *BPTT* and *e-prop* because it is a well established benchmark for  
240 RNNs.

241 **Details of the network model:** The neurons were structured into 3 layers. The network was  
242 recurrently connected within a layer and had feedforward connections across layers. Each layer  
243 consisted of 80 LIF neurons and 720 ALIF neurons (9.1 million weights). The neurons in  
244 LSNNs had a membrane time constant of  $\tau_m = 20$  ms, an adaptation time constant of  $\tau_a = 500$   
245 ms, an adaptation strength of  $\beta = 0.074$ , a baseline threshold  $v_{th} = 0.2$ , and a refractory period  
246 of 2 ms. Synaptic delays were randomly chosen from  $\{1, 2\}$  ms with equal probability. The  
247 membrane time constant of output neurons was  $\tau_{out} = 3$  ms.

248 ***E-prop* with many layers of recurrent neurons:** If one naively applies *e-prop* in such a  
249 configuration, the partial derivative  $\frac{\partial E}{\partial z_j^t}$  is non-zero only if  $j$  belongs to the last layer, whereas  
250 earlier layers would not receive any learning signal. To avoid this, we connected all neurons in  
251 all layers of the RNN to the output neurons. Therefore, the outputs  $y_k^t$  of the RNN was given as  
252  $y_k^t = \sum_{t' \leq t} \kappa^{t-t'} \sum_l \sum_i W_{kj}^{out,(l)} z_j^{(l),t'}$ , where  $z_j^{(l),t'}$  denotes the visible state of a neuron  $j$  within  
253 the layer  $l$ . As a result, the learning signals in the case of *e-prop* were non-zero for neurons in  
254 every layer.

255 ***E-prop* with the CTC loss function:**  $E_{CTC}$  is defined based on the log-likelihood of obtaining  
256 the sequence of labeled phonemes given the network outputs  $y_k^t$ . We refer to (Graves et al.,  
257 2006) for the formal definition of the probabilistic model. Equation (7.27) in (Graves, 2012)  
258 shows the gradient of the loss function  $E_{CTC}$  with respect to the activity of the outputs  $y_k^t$  that  
259 we denote as  $\frac{dE}{dy_k^t}$ . Using the linear relationship between the visible state  $z_j^{(l),t}$  and the outputs  
260  $y_k^t$ , we obtain that the partial derivative  $\frac{\partial E_{CTC}}{\partial z_j^{(l),t}}$  that we need in order to find the learning signals  
261 used in *e-prop* are defined as  $\sum_{t' \geq t} \kappa^{t'-t} \sum_k \frac{dE}{dy_k^{t'}} B_{jk}^{(l)}$ . Here,  $B_{jk}^{(l)}$  denote the broadcast weights  
262 to the layer  $l$ .

263 **Details of the dataset preparation and of the input preprocessing:** The TIMIT dataset  
264 was split in the same manner as in (*Graves et al., 2013*) and in the frame-wise version of the  
265 task. The raw audio was preprocessed before it was provided as an input  $\mathbf{x}^t$  to the network.  
266 This included the following steps: computation of a Fourier-transform based filter-bank with 40  
267 coefficients and an additional channel for the signal energy (with step size 10 ms and window  
268 size 25 ms), computation of the first and the second derivatives, concatenation of all computed  
269 factors, which totals to 123 input channels. Normalization over the training set was done in the  
270 same manner as in the frame-wise version of the task.

271 In order to map the inputs into the temporal time domain of LSNNs, each preprocessed  
272 audio frame was fed as inputs  $\mathbf{x}^t$  to the LSNN for 5 consecutive 1 ms steps.

273 **Details of the learning procedure:** All models were trained for a total of 60 epochs, where  
274 gradients were computed using batches of 8 sequences. The learning rate was initialized to  
275  $10^{-3}$  and decayed every 15 epochs by a factor of 0.3. We used early stopping to report the  
276 test error, as in the previous task. Dropout was applied during training between the hidden  
277 layers and at the output neurons with a dropout probability of 0.3. As in the frame-wise setup,  
278 the weight updates were implemented using Adam with the default hyperparameters (*Kingma*  
279 *and Ba, 2014*) except for  $\epsilon_{\text{Adam}} = 10^{-5}$ . For *random e-prop* and *adaptive e-prop*, broadcast  
280 weights  $B_{jk}$  were initialized using a Gaussian distribution with a mean of 0 and a variance of  
281 1 and  $1/n$  respectively. In *adaptive e-prop*, we used L2 weight decay on readout and broadcast  
282 weights according to S2.3 using a factor of  $C_{\text{decay}} = 10^{-4}$ . When the global norm of gradients  
283  $N_{\text{clip}} = \|\widehat{\frac{dE}{dW_{ji}^{\text{in}}}}\|^2 + \|\widehat{\frac{dE}{dW_{ji}^{\text{rec}}}}\|^2 + \|\widehat{\frac{dE}{dW_{ji}^{\text{out}}}}\|^2$  was larger than 1, we scaled the gradients by a factor of  
284  $\frac{1}{N_{\text{clip}}}$ . We used beam search decoding with a beam width of 100. As in (*Graves et al., 2013*), the  
285 networks were trained on all 61 phoneme labels but were then mapped to a reduced phoneme  
286 set (39 classes) for testing.

### 287 **S3.3 Applying *e-prop* to an episodic memory task**

288 The FORCE training method (*Nicola and Clopath, 2017*) arguably defines the state-of-the-art  
289 for training methods for RSNNs that do not need to backpropagate gradients through time.  
290 FORCE learning uses a synaptic plasticity rule that required knowledge of the values of all  
291 synaptic weights in the network. This rule was not argued to be biologically plausible, but no  
292 other method for training an RSNN to solve the task described below was known so far.

293 In order to compare *e-prop* to FORCE learning, we tested *e-prop* on the task to replay a  
294 movie segment that had been repeatedly presented to the network (*Nicola and Clopath, 2017*).  
295 Specifically, it had to generate at each time step the values of all pixels that described the video  
296 frame of the movie at that time step. This episodic memory task was arguably the most difficult  
297 task for which an RSNN was previously trained in (*Nicola and Clopath, 2017*),

298 Here, we considered an extension to this task: the RNN had to replay 1 out of 3 possible  
299 movies, where the desired movie index was provided as a cue to the network, see Fig. S1A. As  
300 in (*Nicola and Clopath, 2017*), the RNN received also a clock-like input signal to indicate the  
301 current position in the movie. We show in Fig. S1B that an LSNN can be trained to solve this  
302 task by either one of the *e-prop* versions (see Movie S1), and that *e-prop* performs almost as  
303 well as *BPTT*.

304 **Details of the network model:** We used an LSNN that consisted of 700 LIF neurons and 300  
305 ALIF neurons. Each neuron had a membrane time constant of  $\tau_m = 20$  ms and a refractory  
306 period of 5 ms. ALIF neurons had a threshold adaptation time constant of 500 ms, and a  
307 threshold adaptation strength of  $\beta = 0.07$ . All neurons had a baseline threshold of  $v_{th} = 0.62$ .  
308 All 5544 output neurons had a membrane time constant of  $\tau_{out} = 4$  ms.

309 **Details of the dataset preparation and of the input scheme:** We manually chose three  
310 movie clips from the Hollywood 2 dataset (*Marszatek et al., 2009*), which contained between 0  
311 and 2 scene cuts\*, see Movie S1. The movie clips were clipped to a length of 5 seconds and spa-  
312 tially subsampled to a resolution of  $66 \times 28$  pixels. Since our simulations used 1 ms as a discrete  
313 time step, we linearly interpolated between the frames of the original movie clips, which had a  
314 framerate of 25 frames per second. In total, we obtained a target signal with  $66 \times 26 \times 3 = 5544$   
315 dimensions, whose values were divided by a constant of 255, such that they fit in the range of  
316  $[0, 1]$ .

317 The network received input from 115 input neurons, divided into 23 groups of 5 neurons.  
318 The first 20 groups indicated the current phase of the target sequence, similar to (*Nicola and*  
319 *Clopath, 2017*). Neurons in group  $i \in \{0, 19\}$  produced regular spike trains with a firing rate  
320 of 50 Hz during the time interval  $[250 \cdot i, 250 \cdot i + 250)$  ms and were silent at other times. The  
321 remaining 3 groups encoded which movie had to be replayed, where each group was assigned  
322 to one of the three movies. To indicate a desired replay of one specific movie, each neuron  
323 in the corresponding group produced a Poisson spike train with a rate of 50 Hz and was silent  
324 otherwise.

325 **Details of the learning procedure:** For learning, we carried out 5 second simulations, where  
326 the network produced a 5544 dimensional output pattern. Gradients were accumulated for 8  
327 successive trials, after which weight updates were applied using Adam with a learning rate of  
328  $2 \cdot 10^{-3}$  and default hyperparameters (*Kingma and Ba, 2014*). The movie to be replayed in each  
329 trial was selected with uniform probability. After every 100 weight updates (iterations), the  
330 learning rate was decayed by a factor of 0.95. For *random e-prop*, we used random broadcast  
331 weights  $B_{jk}$  that were sampled from a Gaussian distribution with a mean of 0 and a variance

---

\*sceneclipautoautotrain00019.avi, sceneclipautoautotrain00061.avi, sceneclipautoautotrain00071.avi

332 of 1. In *adaptive e-prop* we used L2 weight decay (see Section S2.3) for the broadcast weights  
333  $B_{jk}$  and the output weights  $W_{ji}^{\text{out}}$  with a factor of  $C_{\text{decay}} = 0.001$ . To avoid an excessively high  
334 firing rate, regularization, as described in Section S2.2, was applied with  $C_{\text{reg}} = 0.1$  and a target  
335 firing rate of  $f^{\text{target}} = 10$  Hz.

### 336 **S3.4 Simulation details: evidence accumulation task (Fig. 3)**

337 This task was inspired by the task performed by mice in (*Morcos and Harvey, 2016*). Each trial  
338 was split into three periods: the cue period, the delay period, and the decision period. During  
339 the cue period, the agent was stimulated with 7 successive binary cues (“left” or “right”), and  
340 had to take a corresponding binary decision (“left” or “right”) during the decision period. The  
341 trial was considered a success if the decision matched the side that was most often indicated by  
342 the 7 cues. No action was required during the delay period. Each cue lasted for 100 ms and  
343 the cues were separated by 50 ms. The duration of the delay was distributed uniformly between  
344 500 ms and 1500 ms, and the decision period lasted for 150 ms.

345 **Details of the network model and input scheme:** We used an LSNN that consisted of 50  
346 LIF neurons and 50 ALIF neurons. All neurons had a membrane time constant of  $\tau_m = 20$   
347 ms, a baseline threshold of  $v_{\text{th}} = 0.6$ , and a refractory period of 5 ms. The time constants of  
348 the threshold adaptation was set to  $\tau_a = 2000$  ms, and its impact on the threshold was given as  
349  $\beta = 1.74 \cdot 10^{-2}$ .

350 Input to this network was provided by 4 populations of 10 neurons each. The first two input  
351 populations encoded the cues as follows: when a cue indicated the “left” side (resp. the “right”  
352 side), all the neurons within the first (resp. the second) population produced Poisson spike trains  
353 with a firing rate of 40 Hz. The third input population spiked randomly throughout the decision  
354 period with a firing rate of 40 Hz and was silent otherwise. All the neurons in the last input

355 population produced stationary Poisson spike trains of 10 Hz throughout the trial, which was  
356 useful in particular to avoid that the network becomes quiescent during the delay.

357 **Details of the learning procedure:** For learning, we used *e-prop* for classification tasks, see  
358 Section S3.1. The target label  $\pi_k^{*,t}$  was given as the correct output during the decision period at  
359 the end of a trial. To help the network solving the task, we used a curriculum with an increasing  
360 number of cues. We first trained with a single cue, and increased the number of cues to 3, 5 and  
361 finally 7. The number of cues increased each time the network achieved less than 8% error on  
362 512 validation trials. The same criterion is used to stop training once 7 cues are reached.

363 Independent of the learning algorithm that was used (*BPTT*, *e-prop*), a weight update was  
364 applied once every 64 trials and the gradients were accumulated during those trials additively.  
365 All weight updates were implemented using Adam with default parameters (*Kingma and Ba*,  
366 2014) and a learning rate of  $5 \cdot 10^{-3}$ . In the cases of *random e-prop* and *adaptive e-prop*,  
367 broadcast weights  $B_{jk}$  were initialized using a Gaussian distribution with mean 0 and variance  
368 1. In *adaptive e-prop* we used L2 weight decay (see Section S2.3) for the broadcast weights  
369  $B_{jk}$  and the output weights  $W_{ji}^{\text{out}}$  with a factor of  $C_{\text{decay}} = 0.001$ . In addition, firing rate  
370 regularization, as described in Section S2.2, was applied with  $C_{\text{reg}} = 1$ . and a target firing rate  
371 of  $f^{\text{target}} = 10$  Hz.

## 372 **S4 Applying supervised learning with *e-prop* to artificial neu-** 373 **ral networks (LSTMs)**

374 Here we show that *e-prop* can also be applied to artificial neural networks. We chose long short-  
375 term memory (LSTM) networks (*Hochreiter and Schmidhuber, 1997*) for this demonstration,  
376 whose performance defines the standard for RNNs in machine learning. We demonstrate in  
377 Section S4.1 that LSTM networks can achieve competitive results on TIMIT when trained with

378 *e-prop*, followed by details on these simulations (Section S4.2). In the following sections, we  
379 provide details on the LSTM model used (Section S4.3) and on eligibility traces for LSTM units  
380 (Section S4.4).

## 381 **S4.1 Speech recognition with LSTM networks and *e-prop***

382 In Results, we have used *e-prop* to train LSNNs on the speech recognition task TIMIT (see  
383 Fig. 2). To test whether *e-prop* is effective also for artificial neural networks, we applied it  
384 to LSTM network on the very same task in its two flavors of frame-wise classification and  
385 sequence transcription.

386 Supplementary figure S2 shows that *E-prop* approximates the performance of *BPTT* in both  
387 versions of TIMIT also for LSTM networks very well. As for LSNNs, we trained as in (*Graves*  
388 *et al.*, 2013) an LSTM network consisting of a feedforward sequence of three recurrent networks  
389 in the more difficult version of TIMIT involving sequence transcription.

## 390 **S4.2 Simulation details: speech recognition task with LSTMs (Fig. S2)**

391 The data preparation in the two setups (frame-wise phoneme classification and phoneme se-  
392 quence recognition) were identical to the LSNN case. They are described in Section S3.2. The  
393 details on the network models and training procedures are described next for the two task setups  
394 separately.

### 395 **S4.2.1 Frame-wise phoneme classification with LSTM networks**

396 **Details of the network model:** We used a bi-directional network architecture (*Graves and*  
397 *Schmidhuber, 2005*), where the output of an LSTM network was augmented by the output a  
398 second LSTM network that received the input sequence in reverse time order. Each of the two  
399 networks consisted of 200 LSTM units.



400 We used a 61-fold softmax output, one for each class of the TIMIT dataset. The LSTM had  
401  $\approx 0.4$  million weights, which matched the number of weights in the LSNN for the same task.

402 **Details of the learning procedure:** LSTM networks were trained in the same way as LSNNs,  
403 see Section S3.2, except for the following differences in training hyper parameters: We decayed  
404 the learning rate after every 500 weight updates by a factor of 0.3. For L2 weight decay on  
405 readout and broadcast weights according to S2.3 we used a factor of  $C_{\text{decay}} = 10^{-3}$  for LSTMs.  
406 As LSTM units are not spiking, we did not use firing rate regularization.

#### 407 **S4.2.2 Phoneme sequence recognition with CTC and LSTM networks**

408 We compared *e-prop* and *BPTT* on the task and the network architecture used in (*Graves et al.*,  
409 2013). As for LSNNs, we employed Connectionist Temporal Classification (CTC) to achieve  
410 phoneme sequence recognition (see Section “Phoneme sequence recognition with CTC” in Sec-  
411 tion S3.2). This enabled us to train networks on unaligned sequence labeling tasks end-to-end.

412 **Details of the network model:** The neurons of were structured into 3 recurrent layers. In  
413 each layer there were 250 LSTM units. All neurons in all layers of the RNN were connected to  
414 the output layer (see “*E-prop* with many layers of recurrent neurons” in Section S3.2).

415 **Details of the learning procedure:** LSTM networks were trained in the same way as LSNNs,  
416 see Section S3.2. In the case of *BPTT*, we also used the peephole feature in the LSTM model.

#### 417 **S4.3 LSTM network model**

418 We use a standard model for LSTM units (*Hochreiter and Schmidhuber, 1997*), for which the  
419 hidden state at time step  $t$  is a one dimensional vector containing only the content of the memory  
420 cell  $c_j^t$ , such that  $\mathbf{h}_j^t \stackrel{\text{def}}{=} [c_j^t]$ , and  $z_j^t$  is the value of its output. The memory cell can be viewed as a

421 register which supports writing, updating, deleting and reading. These operations are controlled  
 422 independently for each cell  $j$  at each time  $t$  by input, forget and output gates (denoted by  $i_j^t$ ,  $f_j^t$   
 423 and  $o_j^t$  respectively). The new cell state candidate that may replace the cell state  $c_j^{t-1}$  at each  
 424 time step  $t$  is denoted  $\tilde{c}_j^t$ . The input, forget, and output sigmoidal gates as well as the cell state  
 425 candidate of an LSTM unit  $j$  are defined by the following equations:

$$i_j^t = \sigma\left(\sum_i W_{ji}^{\text{rec},i} z_i^{t-1} + \sum_i W_{ji}^{\text{in},i} x_i^t\right) \quad (\text{S18})$$

$$f_j^t = \sigma\left(\sum_i W_{ji}^{\text{rec},f} z_i^{t-1} + \sum_i W_{ji}^{\text{in},f} x_i^t\right) \quad (\text{S19})$$

$$o_j^t = \sigma\left(\sum_i W_{ji}^{\text{rec},o} z_i^{t-1} + \sum_i W_{ji}^{\text{in},o} x_i^t\right) \quad (\text{S20})$$

$$\tilde{c}_j^t = \tanh\left(\sum_i W_{ji}^{\text{rec},c} z_i^{t-1} + \sum_i W_{ji}^{\text{in},c} x_i^t\right), \quad (\text{S21})$$

426 where all the weights used here are parameters of the model (we also used biases that were  
 427 omitted for readability). Using these notations, one can now write the update of the state of an  
 428 LSTM unit  $j$  in a form that we can relate to our general formalism:

$$c_j^t = f_j^t c_j^{t-1} + i_j^t \tilde{c}_j^t \quad (\text{S22})$$

$$z_j^t = o_j^t c_j^t. \quad (\text{S23})$$

429 In terms of the computational graph in Fig. 5 equation (S22) defines  $M(c_j^{t-1}, \mathbf{z}^{t-1}, \mathbf{x}^t, \mathbf{W})$  and  
 430 (S23) defines  $f(c_j^t, \mathbf{z}^{t-1}, \mathbf{x}^t, \mathbf{W})$ .

#### 431 **S4.4 Eligibility traces for LSTM units**

432 Eligibility traces for LIF neurons and ALIF neurons were derived in Section “Derivation of  
 433 eligibility traces for concrete neuron models” in Methods. Here, we derive eligibility traces for  
 434 the weights of LSTM units.

435 To obtain the eligibility traces, we note that the state dynamics of an LSTM unit is given by:

$$436 \frac{\partial \mathbf{h}_j^{t+1}}{\partial \mathbf{h}_j^t} = \frac{\partial c_j^{t+1}}{\partial c_j^t} = f_j^t. \text{ For each weight } W_{ji}^{A,B} \text{ with } A \text{ being either “in” or “rec” and } B \text{ being } i, f,$$

437 or  $c$ , we compute a set of eligibility traces. For example, the eligibility vectors for the recurrent  
 438 weights to the input gate  $W_{ji}^{\text{rec},i}$ , are updated according to equation (19), leading to:

$$\epsilon_{ji}^{i,t} = \rho_j^{t-1} \epsilon_{ji}^{i,t-1} + \tilde{c}_j^t v_j^t (1 - v_j^t) z_i^{t-1}, \quad (\text{S24})$$

439 resulting in eligibility traces:

$$e_{ji}^{i,t} = \sigma_j^t \epsilon_{ji}^{i,t}. \quad (\text{S25})$$

440 Similarly, the eligibility traces for the input weights to the input gate are obtained by replacing  
 441  $z_i^{t-1}$  with  $x_i^t$ .

442 **Output gates:** The gradients with respect to the parameters of the output gate do not require  
 443 additional eligibility traces. This is because the output gate contributes to the observable state  
 444 but not to hidden state, see equations S22 and S23. Therefore, one can use the standard fac-  
 445 torization of the error gradient as used in *BPTT*. For the recurrent weights to the output gates  
 446  $W_{ji}^{\text{rec},o}$ , the gradient is given by:

$$\frac{dE}{dW_{ji}^{\text{rec},o}} = \sum_t \frac{dE}{dz_j^t} \frac{\partial z_j^t}{\partial W_{ji}^{\text{rec},o}} = \sum_t \frac{dE}{dz_j^t} c_j^t \sigma_j^t (1 - \sigma_j^t) z_i^{t-1}. \quad (\text{S26})$$

447 Hence, when applying *e-prop* to LSTM units, we use the same approximation of the ideal  
 448 learning signal  $\frac{dE}{dz_j^t}$  as for other parameters and the remaining term is local, depends only on  $t$   
 449 and  $t - 1$  and does not require eligibility traces. For input weights to the output gate  $W_{ji}^{\text{in},o}$ , the  
 450 gradient is obtained by replacing  $z_i^{t-1}$  with  $x_i^t$ .

## 451 **S5 Reward-based e-prop: Application of e-prop to policy gra-** 452 **dient RL**

### 453 **S5.1 Synaptic plasticity rules for reward-based e-prop**

454 Here, we derive the synaptic plasticity rules that result from gradients of the loss function  $E$ , as  
 455 given in equation (28), see Fig. S3 for the network architecture. As a result of the general actor-

456 critic framework with policy gradient, this loss function additively combines the loss function  
457 for the policy  $E_\pi$  (actor) and the value function  $E_V$  (critic).

458 We consider two cases: First, a simplified case where in each trial, one out of  $K$  discrete  
459 actions is taken at a single time point. In particular this action is taken at the end of the trial. This  
460 is the setup of the reward-based version of the evidence accumulation task of Fig. 3, see Fig. S4  
461 for performance results. Second, we analyse a more general case where continuous actions are  
462 taken throughout the trial. This is the setup of the delayed arm reaching task (Fig. 4). For both  
463 cases, we derive the gradients for the parts  $E_\pi$  and  $E_V$  of the loss function  $E$ , and express the  
464 plasticity rules resulting from these gradients.

465 **Task setup with a discrete action at the end of the trial (Fig. 3):** In this setup, a discrete  
466 action  $a \in \{1, \dots, K\}$  from a set of  $K$  possibilities needs to be taken at the last time step  $T$   
467 of a trial, leading to a binary-valued reward  $r^T$ . As a result, the return  $R^T$  (denoted here for  
468 notational simplicity as  $R$ ) is equal to  $r^T$ . We assume that the agent chooses action  $k$  with  
469 probability  $\pi_k = \text{softmax}_k(y_1^T, \dots, y_K^T) = \exp(y_k^T) / \sum_{k'} \exp(y_{k'}^T)$ . Therefore, we can write  $E_\pi$   
470 as:

$$E_\pi = -R \sum_k \mathbb{1}_{a=k} \log \pi_k . \quad (\text{S27})$$

471 Here and in subsequent equations, we suppress the dependence of the term on the left hand side  
472 on the stochastic action  $a$  that is actually chosen and the resulting reward  $R$ .  $\mathbb{1}_{a=k}$  is the one-hot  
473 encoded action and assumes a value of 1 only if  $a = k$  and is 0 otherwise. Hence, although we  
474 sum over all possible actions, only the term corresponding to the action  $a$  that was taken is non  
475 zero. Interestingly, in the discrete action case, the loss function  $E_\pi$  is reminiscent of the one  
476 used for supervised classification, see equation (S16). But it exhibits two differences: firstly,  
477 the indicator of the selected action  $\mathbb{1}_{a=k}$  replaces the target label  $\pi_k^*$ , and secondly, the loss is  
478 multiplied by the reward  $R$ .

479 In order to optimize  $E$ , as given in (28), we also need to consider  $E_V = \frac{1}{2}(R - V)^2$ , for  
 480 which we can reuse the result for regression (S14). By application of gradient descent using  
 481 equation (1), and using the estimator  $\widehat{\frac{\partial E}{\partial z_j^t}}$  given in (29), we obtain the synaptic plasticity rule  
 482 that implements *reward-based e-prop* in this case:

$$\Delta W_{ji}^{\text{rec}} = -\eta \underbrace{\left[ (R - V) \sum_k B_{jk}^\pi (\pi_k - \mathbb{1}_{a=k}) - C_V (R - V) B_j^V \right]}_{L_j} \bar{e}_{ji}^T, \quad (\text{S28})$$

483 where we denote with  $B_{jk}^\pi$  the broadcast weights from output neurons  $y_k$ , and with  $B_j^V$  the  
 484 broadcast weights from the output neuron that produces the value prediction  $V$ . The choice  
 485 of these broadcast weights then defines which variant of *reward-based e-prop* is employed  
 486 (*reward-based symmetric e-prop*, *reward-based adaptive e-prop*, or *reward-based random e-*  
 487 *prop*).

488 For the synaptic connections of output neurons, the loss gradient can be computed directly  
 489 from the loss function (28). We also subtract the value prediction to reduce variance of the  
 490 gradient estimate as in (29), and obtain for the update rules:  $\Delta W_{kj}^{\pi, \text{out}} = -\eta(R - V)(\pi_k -$   
 491  $\mathbb{1}_{a=k})\mathcal{F}_\kappa(z_j^T)$ , and  $\Delta W_j^V = \eta C_V (R - V)\mathcal{F}_\kappa(z_j^T)$ . Similarly, the updates of the biases of output  
 492 neurons are:  $\Delta b_k^{\pi, \text{out}} = -\eta(R - V)(\pi_k - \mathbb{1}_{a=k})$ , and  $\Delta b^V = \eta C_V (R - V)$ .

493 **Continuous actions throughout the trial (Fig. 4A-C):** In this setup, we assume that the  
 494 agent can take at certain decision times  $t_0, \dots, t_n, \dots$  real-valued actions  $\mathbf{a}$ . We also assume  
 495 that each component  $k$  of this action vector follows independent Gaussian distributions, with a  
 496 mean given by the output  $y_k$  and a fixed variance  $\sigma^2$ .

497 We consider first the regression problem defined by the loss function  $E_V$ , and note that  
 498 a major difference to the previous case is that the return  $R^t$  integrates future rewards arrive  
 499 long after an action was taken. We begin with the result for regression from equation (S14).

500 Substituting the relevant variables, we obtain an estimation of the loss gradient:

$$\widehat{\frac{dE_V}{dW_{ji}^{\text{rec}}}} = - \sum_{t'} (R^{t'} - V^{t'}) W_j^{V, \text{out}} \bar{e}_{ji}^{t'}, \quad (\text{S29})$$

501 where  $W_j^{V, \text{out}}$  are the weights of the output neuron  $V_j^t$  predicting the value function  $\mathbb{E}[R^t]$ . In  
 502 order to overcome the obstacle that an evaluation of the return  $R^{t'}$  requires to know future  
 503 rewards, we introduce temporal difference errors  $\delta^t = r^t + \gamma V^{t+1} - V^t$ , and use that  $R^{t'} - V^{t'}$   
 504 is equal to the sum  $\sum_{t \geq t'} \gamma^{t-t'} \delta^t$ . We then reorganize the two sums over  $t$  and  $t'$  (note that the  
 505 interchange of the summation order amounts to the equivalence between forward and backward  
 506 view of RL (*Sutton and Barto, 2018*)):

$$\widehat{\frac{dE_V}{dW_{ji}^{\text{rec}}}} = - \sum_{t'} \left( \sum_{t \geq t'} \gamma^{t-t'} \delta^t \right) W_j^{V, \text{out}} \bar{e}_{ji}^{t'} \quad (\text{S30})$$

$$= - \sum_t \delta^t \sum_{t' \leq t} \gamma^{t-t'} W_j^{V, \text{out}} \bar{e}_{ji}^{t'} \quad (\text{S31})$$

$$= - \sum_t \delta^t \mathcal{F}_\gamma(W_j^{V, \text{out}} \bar{e}_{ji}^t). \quad (\text{S32})$$

507 For the other part  $E_\pi$  in the loss function  $E$ , we consider the estimator  $\widehat{\frac{\partial E}{\partial z_j^t}}$  given in (29), and use  
 508 our previous definition that each component  $k$  of the action follows an independent Gaussian,  
 509 which has a mean given by the output  $y_k$  and a fixed variance  $\sigma^2$ . The estimator then becomes:

$$\widehat{\frac{\partial E_\pi}{\partial z_j^t}} = - \sum_k W_{kj}^{\pi, \text{out}} \sum_{\{n | t_n \geq t\}} \kappa^{t_n - t} (R^{t_n} - V^{t_n}) \frac{a_k^{t_n} - y_k^{t_n}}{\sigma^2}, \quad (\text{S33})$$

510 where  $W_{kj}^{\pi, \text{out}}$  are the weights onto the output neurons  $y_k^t$  defining the policy  $\pi$ , and  $\kappa$  is the  
 511 constant of the low-pass filtering of the output neurons. Following a derivation similar to equa-

512 tions (S12) to (S14), we arrive at an estimation of the loss gradient of the form:

$$\widehat{\frac{dE_\pi}{dW_{ji}^{\text{rec}}}} = \sum_t \widehat{\frac{\partial E_\pi}{\partial z_j^t}} e_{ji}^t \quad (\text{S34})$$

$$= - \sum_{t,k} W_{kj}^{\pi,\text{out}} \sum_{\{n|t_n \geq t\}} (R^{t_n} - V^{t_n}) \frac{a_k^{t_n} - y_k^{t_n}}{\sigma^2} \kappa^{t_n-t} e_{ji}^t \quad (\text{S35})$$

$$= - \sum_{n,k} (R^{t_n} - V^{t_n}) W_{kj}^{\pi,\text{out}} \frac{a_k^{t_n} - y_k^{t_n}}{\sigma^2} \underbrace{\sum_{t \leq t_n} \kappa^{t_n-t} e_{ji}^t}_{\bar{e}_{ji}^{t_n}} \quad (\text{S36})$$

513 Like in the derivation of the gradient of  $E_V$ , this formula hides a sum over future rewards in  
 514  $R^{t_n}$  that cannot be computed online. It is resolved by introducing the backward view as in  
 515 equation (S32). We arrive at the loss gradient:

$$\widehat{\frac{dE_\pi}{dW_{ji}^{\text{rec}}}} = - \sum_t \delta^t \mathcal{F}_\gamma \left( \sum_k W_{kj}^{\pi,\text{out}} \frac{a_k^t - y_k^t}{\sigma^2} e_{ji}^t \right) \quad (\text{S37})$$

516 Importantly, an action is only taken at times  $t_0, \dots, t_n, \dots$ , hence for all other times, we set the  
 517 term  $(a_k^t - y_k^t)$  to zero.

518 Finally, the gradient of the loss function  $E$  is the sum of the gradients of  $E_\pi$  and  $E_V$ , equa-  
 519 tions (S32) and (S37) respectively. Application of stochastic gradient descent with a learning  
 520 rate of  $\eta$  yields the synaptic plasticity rule given in the equations (30) and (31).

521 The gradient of  $E$  with respect to the output weights can be computed directly from equa-  
 522 tion (28) without the theory of *e-prop*. However, it also needs to account for the sum over future  
 523 rewards that is present in the term  $R^t - V^t$ . Using a similar derivation as in equations (S30)-  
 524 (S32) the plasticity rule for these weights becomes:

$$\Delta W_{kj}^{\pi,\text{out}} = -\eta \sum_t \delta^t \mathcal{F}_\gamma \left( \frac{y_k^t - a_k^t}{\sigma^2} \mathcal{F}_\kappa(z_j^t) \right) \quad (\text{S38})$$

$$\Delta W_j^{\text{V,out}} = \eta C_V \sum_t \delta^t \mathcal{F}_\gamma \left( \mathcal{F}_\kappa(z_j^t) \right) \quad (\text{S39})$$

525 Similarly, we also obtain for the update rules of the biases of the output neurons:  $\Delta b_k^{\pi,\text{out}} =$   
 526  $-\eta \sum_t \delta^t \mathcal{F}_\gamma \left( \frac{y_k^t - a_k^t}{\sigma^2} \right)$ , and  $\Delta b_j^{\text{V,out}} = \eta C_V \sum_t \delta^t$ .

## 527 **S5.2 Simulation details: evidence accumulation task (Fig. S4)**

528 The task considered in this experiment was the same as in Section S3.4, but while the task was  
529 there formulated as a supervised learning, the network is trained here using a reinforcement  
530 learning setup. In this setup, the agent had to choose a side at the end of the trial, which  
531 represented the two discrete action possibilities. A reward of 1 was given at the end of the trial  
532 if the agent selected the side on which more cues than on the other had previously been given,  
533 otherwise no reward was given. The network model remained the same as in the supervised  
534 setup. The result is shown in Fig. S4: The task can be learnt by *reward-based e-prop*.

535 **Details of the decision process:** In the reinforcement learning setup of the task, one binary  
536 action formalizes the decision of the agent (“left” or “right”) at the end of the trial. This decision  
537 was sampled according to probabilities  $\pi_k$  that are computed from the network output using a  
538 softmax operation, see “Case of a discrete action at the end of a trial” in Section S5.1.

539 **Details of the learning procedure:** For learning, we simulated batches of 64 trials, and ap-  
540 plied weight changes at the end of each batch. Independent of the learning method, we used  
541 Adam to implement the weight update, using gradients that were accumulated in 64 trials using  
542 a learning rate of  $5 \cdot 10^{-3}$  and default hyperparameters (*Kingma and Ba, 2014*). For *random*  
543 *e-prop*, we sampled broadcast weights  $B_{jk}$  from a Gaussian distribution with a mean of 0 and  
544 a variance of 1. To avoid an excessively high firing rate, regularization, as described in Sec-  
545 tion S2.2, was applied with  $C_{\text{reg}} = 0.1$  and a target firing rate of  $f^{\text{target}} = 10$  Hz.

## 546 **S5.3 Simulation details: delayed arm reaching task (Fig. 4)**

547 **Details of the arm model:** The arm consisted of two links, with one link connected to the  
548 other link by a joint, which is itself connected by a joint to a fixed position in space. The



549 configuration of this arm model at time  $t$  can be described by the angles  $\phi_1^t$  and  $\phi_2^t$  of the two  
550 joints measured against the horizontal and the first link of the arm respectively, see Fig. 4A.  
551 For given angles, the position  $\mathbf{y}^t = (x^t, y^t)$  of the tip of the arm in Euclidean space is given by  
552  $x^t = l \cos(\phi_1^t) + l \cos(\phi_1^t + \phi_2^t)$  and  $y^t = l \sin(\phi_1^t) + l \sin(\phi_1^t + \phi_2^t)$ . Angles were computed by  
553 discrete integration over time:  $\phi_i^t = \sum_{t' \leq t} \dot{\phi}_i^{t'} \delta t + \phi_i^0$  using  $\delta t = 1$  ms.

554 **Details of the delayed arm reaching task and of the input scheme:** The agent could control  
555 the arm by setting the angular velocities of the two joints to a different value at every ms. There  
556 was a total of 8 possible goal locations, which were evenly distributed on a circle with a radius  
557 of 0.8. The arm was initially positioned so that its tip was equidistant from all the goals. In  
558 each trial, one of the 8 goals was chosen randomly, and indicated as the desired goal location  
559 in the first 100 ms of the trial. Each possible goal location was associated with a separate input  
560 channel, consisting of 20 neurons. They produced a Poisson spike train with a rate of 500  
561 Hz while the corresponding goal location was indicated. After this cue was provided, a delay  
562 period of a randomly chosen length between 100 – 500 ms started, during which the subject  
563 was penalized with a negative reward of  $-0.1$  if it moved outside a central region of radius 0.3.  
564 After this delay period, a go cue instructed the subject to move towards the goal location. This  
565 cue was provided in a separate input channel of 20 neurons, which produced a Poisson spike  
566 train with a rate of 500 Hz for 100 ms. Once the tip of the arm had moved closer than a distance  
567 of 0.1 to the goal location, a positive reward of 1 was given to signal a success. A negative  
568 reward of  $-0.01$  was given for every ms after the go cue started while the arm did not yet reach  
569 the goal, in order to encourage an efficient movement. Going far off the region of interest – a  
570 circle of radius 1 – was penalized with a negative reward of  $-0.1$  at each ms. One trial lasted  
571 for a total of 1.5 seconds – i.e. the subject had 900 ms from the start of the go cue to reach the  
572 goal.

573 The agent also received its current configuration (angles of the arms  $\phi_1$  and  $\phi_2$ , see Fig. 4A)  
574 as input at each time step in the following way: each one of the angles was encoded by a  
575 population of 30 neurons, where each neuron had a Gaussian tuning curve centered on values  
576 distributed evenly between 0 and  $2\pi$ , with a firing rate peak of 100 Hz. The tuning curve had a  
577 standard deviation of  $\frac{4}{30}$ .

578 In addition, if the goal position was successfully reached, the network received this infor-  
579 mation using a separate input channel consisting of 20 neurons that produced a Poisson spike  
580 train with a rate of 500 Hz.

581 **Details of the network model:** The network consisted of 350 LIF neurons and 150 ALIF  
582 neurons. The membrane time constant of all neurons was  $\tau_m = 20$  ms, with a baseline threshold  
583  $v_{th} = 0.6$  and a refractory period of 3 ms. All synaptic delays were 1 ms. The adaptation time  
584 constant of ALIF neurons was set to  $\tau_a = 500$  ms, and the adaptation strength was  $\beta_j = 0.07$ .  
585 The membrane time constant of output neurons was given by  $\tau_{out} = 20$  ms.

586 Actions (angular velocities for the 2 joints) were sampled from a Gaussian distribution with  
587 a mean of  $y_k^t$ , and a standard deviation of  $\sigma = 0.1$ , which was exponentially decayed over  
588 iterations so that it reached  $\sigma = 0.01$  at the end.

589 **Details of the learning procedure:** The network was trained for a total of 16000 weight  
590 updates (iterations). In each iteration, a batch of 200 trials was simulated, and we applied  
591 weight changes at the end of each batch. Independent of the learning method, we used Adam to  
592 implement the weight update, with a learning rate of  $10^{-3}$  and default hyperparameters (*Kingma*  
593 *and Ba, 2014*). For training with *BPTT*, gradients were computed for the loss function given in  
594 equation (28) (using the variance reduction that is made explicit in equation (29)). In the case  
595 of *e-prop*, we used equations (30) and (31). For *random e-prop*, the broadcast weights  $B_{jk}$  were  
596 initialized using a Gaussian distribution with mean 0 and variance 1. To avoid an excessively

597 high firing rate, regularization, as described in Section S2.2, was applied with  $C_{\text{reg}} = 100$  and a  
598 target firing rate of  $f^{\text{target}} = 10$  Hz.

## 599 **S6 Evaluation of four variations of *e-prop* (Fig. S5)**

600 We evaluate here the performance of four variations of *random e-prop*. In these variations, we  
601 used

- 602 • truncated eligibility traces for LIF neurons,
- 603 • global broadcast weights,
- 604 • temporally local broadcast weights, and
- 605 • a replacement of the eligibility trace by the corresponding term of the Clopath rule,

606 respectively. The considered task, whose implementation details are described in Section S6.5,  
607 is an extension of the task used in (*Nicola and Clopath, 2017*). In this task, an RSNN was  
608 trained to autonomously generate a 3 dimensional target signal for 1 second. Each dimension  
609 of the target signal was given by the sum of four sinusoids with random phases and amplitudes.  
610 Similar to (*Nicola and Clopath, 2017*), the network received a clock input that indicated the  
611 current phase of the pattern.

612 In Fig. S5A, we show the spiking activity of a randomly chosen subset of 20 out of the  
613 600 neurons in the RSNN along with the output of the three output neurons after application  
614 of *random e-prop* for 1, 100, and 500 seconds, respectively. In this representative example, the  
615 network achieved a very good fit to the target signal (normalized mean squared error 0.01).

### 616 **S6.1 A truncated eligibility trace for LIF neurons**

617 A replacement of the term  $\bar{z}_i^t$  with  $z_i^t$  in equation (21) yields a performance that is reported in  
618 panel B of Fig. S5 as “Trunc. e-trace”. Its performance is for the considered task only slightly

619 worse than that of *random e-prop*.

## 620 **S6.2 Global broadcast weights**

621 Since 3-factor rules have primarily been studied so far with a global 3rd factor, we asked how the  
622 performance of *e-prop* would change if the same broadcast weight would be used for broadcast  
623 connections between all output neurons  $k$  and network neurons  $j$ . We set this global broadcast  
624 weight equal to  $\frac{1}{\sqrt{n}}$ . Fig. S5B shows that the performance for the considered task is much worse  
625 than that of *random e-prop*. We have also tested this on TIMIT with LSNNs and found there an  
626 increase of the frame-wise error rate from 36.9% to 52% when replacing the broadcast weights  
627 of *random e-prop* with a global one. On the harder version of same task, the error rate at the  
628 sequence level increased from 34.7% to 60%.

## 629 **S6.3 Temporally local broadcast weights**

630 One can train RNNs also by applying the broadcast alignment method of (*Lillicrap et al., 2016*)  
631 and (*Nøkland, 2016*) for feedforward networks to the unrolled version (see Fig. 1B) of the RNN.  
632 In contrast to *e-prop*, this approach suggests to draw new random broadcast weights for each  
633 layer of the unrolled network, i.e., for each time step of the RNN. Fig. S5C shows that this  
634 variation of *random e-prop* performs much worse. However an intermediate version where the  
635 random broadcast weights are redrawn every 20 ms performs about equally well as *random*  
636 *e-prop* for the considered task.

## 637 **S6.4 Replacing the eligibility trace by the corresponding term of the Clopath** 638 **rule**

639 The dependence of the synaptic plasticity rules from *e-prop* on the postsynaptic membrane  
640 potential through the pseudo-derivative in the eligibility traces yields some similarity to some  
641 previously proposed rules for synaptic plasticity, such as that of (*Clopath et al., 2010*), which

642 were motivated by experimental data on the dependence of synaptic plasticity on the postsy-  
643 naptic membrane potential. We therefore tested the performance of *random e-prop*, where the  
644 eligibility trace was replaced by the corresponding term from the “Clopath rule”:

$$[v_j^t - v_{\text{th}}^+]^+ [\bar{v}_j^t - v_{\text{th}}^-]^+ z_i^{t-1}, \quad (\text{S40})$$

645 where  $\bar{v}_j^t$  is an exponential trace of the post synaptic membrane potential, with a time constant  
646 of 10 ms chosen to match their data.  $[\cdot]^+$  is the rectified linear function. The thresholds  $v_{\text{th}}^-$   
647 and  $v_{\text{th}}^+$  were  $\frac{v_{\text{th}}}{4}$  and 0 respectively. Fig. S5B shows that the resulting synaptic plasticity rule  
648 performed quite well.

## 649 **S6.5 Simulation details: pattern generation task**

650 The performance in this task is reported as a normalized mean squared error (nmse) that we  
651 defined for this task as:  $\text{nmse} = \frac{\sum_{t,k} (y_k^t - y_k^{*,t})^2}{\sum_{t,k} (y_k^{*,t} - \bar{y}_k^*)^2}$ , where we set  $\bar{y}_k^* = \frac{1}{T} \sum_t y_k^{*,t}$ .

652 **Details of the network model and of the input scheme:** We used a network that consisted of  
653 600 LIF neurons. Each neuron had a membrane time constant of  $\tau_m = 20$  ms and a refractory  
654 period of 3 ms. The firing threshold was set to  $v_{\text{th}} = 0.41$ . Output neurons used a membrane  
655 time constant of  $\tau_{\text{out}} = 20$  ms. The network received input from 20 input neurons, divided  
656 into 5 groups, which indicated the current phase of the target sequence similar to (*Nicola and*  
657 *Clopath, 2017*). Neurons in group  $i \in \{0, 4\}$  produced 100 Hz regular spike trains during the  
658 time interval  $[200 \cdot i, 200 \cdot i + 200)$  ms and were silent at other times.

659 **Details of the target pattern:** The target signal had a duration of 1000 ms and each compo-  
660 nent was given by the sum of four sinusoids, with fixed frequencies of 1 Hz, 2 Hz, 3 Hz, and  
661 5 Hz. At the start of learning, the amplitude and phase of each sinusoid in each component

662 was drawn uniformly in the range  $[0.5, 2]$  and  $[0, 2\pi]$  respectively. This signal was not changed  
663 afterwards.

664 **Details of the learning procedure:** For learning, we computed gradients after every 1 second  
665 of simulation, and carried out the weight update using Adam (*Kingma and Ba, 2014*) with a  
666 learning rate of  $3 \cdot 10^{-3}$  and default hyperparameters. After every 100 iterations, the learning  
667 rate was decayed by a factor of 0.7. For *random e-prop*, the broadcast weights  $B_{jk}$  were sampled  
668 from a Gaussian distribution with a mean of 0 and a variance of  $\frac{1}{n}$ , where  $n$  is the number of  
669 network neurons.

670 Firing rate regularization, as described in Section S2.2, was applied with  $C_{\text{reg}} = 0.5$  and a  
671 target firing rate of  $f^{\text{target}} = 10$  Hz.

## 672 References

673 Amodei et al., 2016. Amodei, D., Ananthanarayanan, S., Anubhai, R., Bai, J., Battenberg, E.,  
674 Case, C., Casper, J., Catanzaro, B., Cheng, Q., Chen, G., Chen, J., Chen, J., Chen, Z.,  
675 Chrzanowski, M., Coates, A., Diamos, G., Ding, K., Du, N., Elsen, E., Engel, J., Fang, W.,  
676 Fan, L., Fougner, C., Gao, L., Gong, C., Hannun, A., Han, T., Johannes, L., Jiang, B., Ju, C.,  
677 Jun, B., LeGresley, P., Lin, L., Liu, J., Liu, Y., Li, W., Li, X., Ma, D., Narang, S., Ng, A.,  
678 Ozair, S., Peng, Y., Prenger, R., Qian, S., Quan, Z., Raiman, J., Rao, V., Satheesh, S., Seeta-  
679 pun, D., Sengupta, S., Srinet, K., Sriram, A., Tang, H., Tang, L., Wang, C., Wang, J., Wang,  
680 K., Wang, Y., Wang, Z., Wang, Z., Wu, S., Wei, L., Xiao, B., Xie, W., Xie, Y., Yogatama, D.,  
681 Yuan, B., Zhan, J., and Zhu, Z. (2016). Deep speech 2 : End-to-end speech recognition in  
682 english and mandarin. In Balcan, M. F. and Weinberger, K. Q., editors, *Proceedings of The*  
683 *33rd International Conference on Machine Learning*, volume 48 of *Proceedings of Machine*  
684 *Learning Research*, pages 173–182, New York, New York, USA. PMLR.

- 685 Bellec et al., 2018. Bellec, G., Kappel, D., Maass, W., and Legenstein, R. (2018). Deep  
686 rewiring: Training very sparse deep networks. *International Conference on Learning Rep-*  
687 *resentations*.
- 688 Clopath et al., 2010. Clopath, C., Büsing, L., Vasilaki, E., and Gerstner, W. (2010). Connec-  
689 tivity reflects coding: a model of voltage-based stdp with homeostasis. *Nature Neuroscience*,  
690 13(3):344.
- 691 Glass et al., 1999. Glass, J., Smith, A., and K. Halberstadt, A. (1999). Heterogeneous acoustic  
692 measurements and multiple classifiers for speech recognition.
- 693 Graves, 2012. Graves, A. (2012). Supervised sequence labelling. In *Supervised Sequence*  
694 *Labelling with Recurrent Neural Networks*, pages 5–13. Springer.
- 695 Graves et al., 2006. Graves, A., Fernández, S., Gomez, F., and Schmidhuber, J. (2006). Con-  
696 nectionist Temporal Classification: Labelling Unsegmented Sequence Data with Recurrent  
697 Neural Networks. In *Proceedings of the 23rd International Conference on Machine Learning*,  
698 ICML '06, pages 369–376, New York, NY, USA. ACM. event-place: Pittsburgh, Pennsylva-  
699 nia, USA.
- 700 Graves et al., 2013. Graves, A., Mohamed, A.-r., and Hinton, G. (2013). Speech recognition  
701 with deep recurrent neural networks. In *Acoustics, Speech and Signal Processing (ICASSP)*,  
702 *2013 IEEE International Conference on*, pages 6645–6649. IEEE.
- 703 Graves and Schmidhuber, 2005. Graves, A. and Schmidhuber, J. (2005). Framewise phoneme  
704 classification with bidirectional LSTM and other neural network architectures. *Neural Net-*  
705 *works*, 18(5-6):602–610.

- 706 Greff et al., 2017. Greff, K., Srivastava, R. K., Koutník, J., Steunebrink, B. R., and Schmidhuber, J. (2017). LSTM: A search space odyssey. *IEEE Transactions on Neural Networks and Learning Systems*, 28(10):2222–2232.
- 707  
708
- 709 Hochreiter and Schmidhuber, 1997. Hochreiter, S. and Schmidhuber, J. (1997). Long short-term memory. *Neural computation*, 9(8):1735–1780.
- 710
- 711 Kappel et al., 2018. Kappel, D., Legenstein, R., Habenschuss, S., Hsieh, M., and Maass, W. (2018). A dynamic connectome supports the emergence of stable computational function of neural circuits through reward-based learning. *eNeuro*, 5(2):ENEURO–0301.
- 712  
713
- 714 Kingma and Ba, 2014. Kingma, D. P. and Ba, J. (2014). Adam: A method for stochastic optimization. *arXiv preprint arXiv:1412.6980*.
- 715
- 716 Lillicrap et al., 2016. Lillicrap, T. P., Cownden, D., Tweed, D. B., and Akerman, C. J. (2016). Random synaptic feedback weights support error backpropagation for deep learning. *Nature Communications*, 7:13276.
- 717  
718
- 719 Marszałek et al., 2009. Marszałek, M., Laptev, I., and Schmid, C. (2009). Actions in context. In *IEEE Conference on Computer Vision & Pattern Recognition*.
- 720
- 721 Morcos and Harvey, 2016. Morcos, A. S. and Harvey, C. D. (2016). History-dependent variability in population dynamics during evidence accumulation in cortex. *Nature Neuroscience*, 19(12):1672.
- 722  
723
- 724 Nicola and Clopath, 2017. Nicola, W. and Clopath, C. (2017). Supervised learning in spiking neural networks with force training. *Nature Communications*, 8(1):2208.
- 725
- 726 Nøkland, 2016. Nøkland, A. (2016). Direct feedback alignment provides learning in deep neural networks. In *Advances in neural information processing systems*, pages 1037–1045.
- 727



728 Sutton and Barto, 2018. Sutton, R. S. and Barto, A. G. (2018). *Reinforcement Learning: An*  
729 *Introduction*. MIT press.

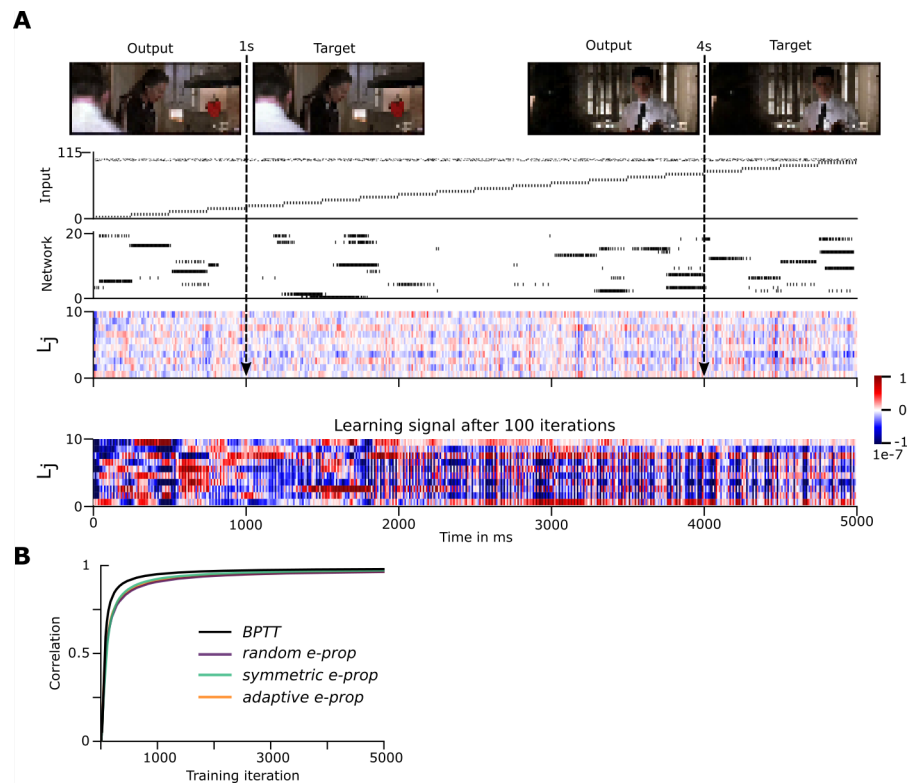

Figure S1: **Performance comparison of *BPTT* and *e-prop* on the episodic memory task from (Nicola and Clopath, 2017).** **A**) Input spikes, network activity (for 20 sample neurons), learning signals, and network outputs (at 1s and 4s, shown at the top) of an LSNN after 1000 training iterations. For comparison we also show learning signals after just 100 iterations, where their amplitude is still large. **B**) Performance of *BPTT* and *e-prop*.

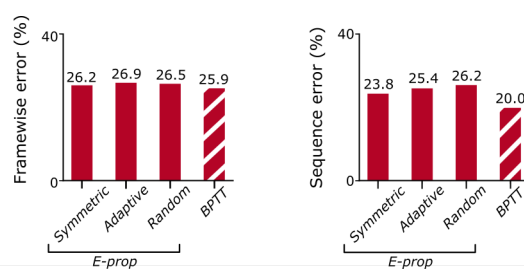

Figure S2: LSTM trained with *BPTT* and *e-prop* on the TIMIT task. Performance of *BPTT* and the three versions of *e-prop* frame-wise phoneme classification (left) and for phoneme sequence recognition (right).

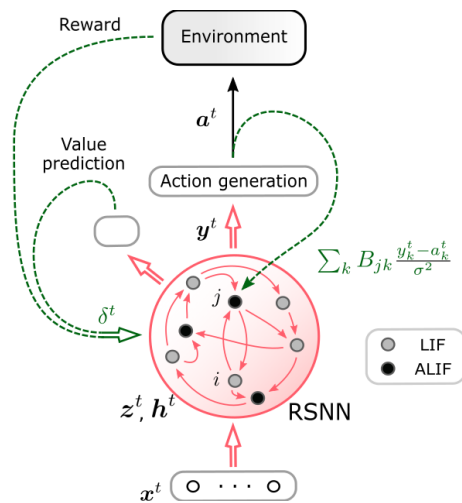

Figure S3: **Learning architecture for reward-based e-prop**: The network input  $x^t$  consists of the current joint angles and input cues. The network produces output  $y^t$  which is used to stochastically generate the actions  $a^t$ . In addition, the network produces the value prediction, which, along with the reward from the environment, is used to calculate the TD-error  $\delta^t$ . The learning signals and the TD-errors are used to calculate the weight update, as denoted by the green dotted lines.

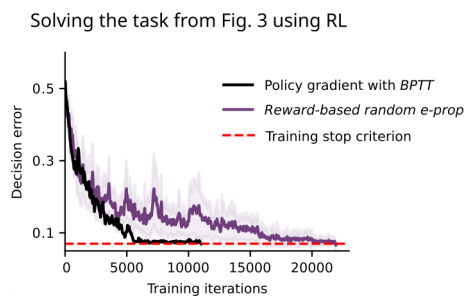

Figure S4: Performance of *reward based random e-prop* and *BPTT* for the RL version of the task from Fig. 3, applied to an LSNN consisting of 50 LIF and 50 ALIF neurons.

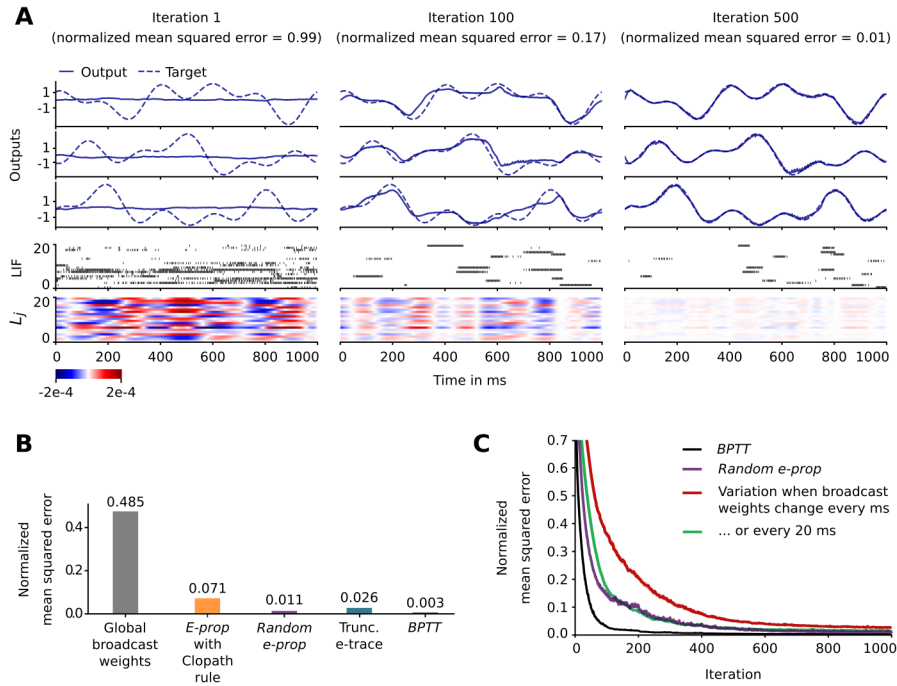

Figure S5: **Evaluation of several variants of random e-prop** **A)** The task is a classical benchmark task for learning in recurrent SNNs: learning to generate a target pattern, extended here to the challenge to simultaneously learn to generate 3 different patterns, which makes credit assignment for errors more difficult. Learning performance with *random e-prop* is shown after training for 1, 100, 500 s. **B)** Normalized mean squared error of several learning algorithms for this task after 500 s of training. “Clopath rule” denotes a replacement of the eligibility trace of *random e-prop* by a corresponding term proposed in (Clopath *et al.*, 2010) based on experimental data. **C)** Learning curves for variations of *random e-prop* with temporally local broadcast weights.

730 **Movie S1**

731 Rodent task from (1, 2) that requires long-term credit assignment for learning: a rodent has  
732 to learn to run along a linear track in a virtual environment, where it encounters several cues  
733 on the left and the right side along the way. It then has to run through a corridor without cues  
734 (giving rise to delays of varying lengths). At the end of the corridor, the rodent has to turn to  
735 either the left or the right side of a T-junction, depending on which side exhibited more cues  
736 along the way.

737 **Movie S2**

738 Dynamics of (BPTT) for the evidence accumulation task: First, a simulation of the network  
739 has to be carried out in order to produce the network state of all neurons for all time steps.  
740 After that the loss function  $E$  can be evaluated. Then the simulated network activity is replayed  
741 backwards in time to assign credit to particular spikes that occurred before the loss function  
742 became non-zero. One sees that the slow time constants that are present in the dynamics of  
743 adapting thresholds of ALIF neurons result in slowly decaying non-vanishing gradients during  
744 the backpropagation through time. In contrast, for LIF neurons the backpropagated gradients  
745 vanish rather quickly.



746 **Movie S3**

747 The computation of the LSNN is accompanied by the computation of synapse specific eligi-  
748 bility traces. An error in the computation only becomes apparent during the so-called decision  
749 period at the end of a trial. In this last phase, a learning signal ( $L_j$ ) that transmits deficiencies  
750 of the network output is provided separately to each neuron. As can be seen from the video  
751 that synapses that project to neurons with adapting thresholds (ALIF neurons) still have non-  
752 vanishing eligibility traces during the last phase, and hence can be combined with the learning  
753 signals at that time to implement long-term credit assignment.

754 **Movie S4**

755 Episodic memory task from (25) trained with random e-prop. The top row presents the  
756 actual movie clip, and the output produced by the trained LSNN. The middle row shows the  
757 input that is presented to the network: a channel that indicates which of the three learned clips  
758 had to be replayed, and an array of input neurons that indicate the current timing in the clip.  
759 The bottom row shows the spiking activity of a subset of the neurons in the LSNN (20 neurons  
760 out of 1000). As can be seen, the network learned via e-prop to distinguish well between the  
761 different clips and also, the LSNN was able to deal with scene cuts, which require the network  
762 to change its output abruptly.

763 **Movie S5**

764 Illustration of the delayed arm-reaching task from Fig. 4: The agent gets the position of the  
765 goal as the GOAL CUE during the first 100ms of a trial. This is followed by a delay period of  
766 variable length during which the arm receives a negative reward for moving outside the area in  
767 the center denoted by the dotted line. Noisy arm movements arise from the stochastic action  
768 selection of policy gradient, and the arm needs to be actively steered back into the circle to  
769 avoid further negative penalties. After the delay period, the agent gets a GO cue (the screen  
770 turns yellow), after which no further negative rewards occur. The agent gets a large positive  
771 reward if it reaches the small circle that was initially marked by the GOAL CUE.

772 **Movie S6**

773 A trial of the delayed arm-reaching task after training with random e-prop: One sees that  
774 the arm moves to the goal immediately after the GO cue is received. The spike encoding of all  
775 the inputs including the position of the arm (top), the GOAL CUE (bottom left), and the GO cue  
776 (middle right) is shown in the middle panel of the video. The instantaneous rewards are shown  
777 in the bottom panel of the video.
